# 1 HillTau: A fast, compact abstraction for model reduction 2 in biochemical signaling networks.

3  
4 Short title: HillTau: A fast, compact abstraction for modeling signaling pathways

5  
6 Upinder S. Bhalla<sup>1\*</sup>

7  
8 <sup>1</sup> NCBS-TIFR, Bangalore, Karnataka, India

9 \* Corresponding Author

10 E-mail: [bhalla@ncbs.res.in](mailto:bhalla@ncbs.res.in)

11

## 12 **Abstract**

13 Signaling networks mediate many aspects of cellular function. The conventional, mechanistically  
 14 motivated approach to modeling such networks is through mass-action chemistry, which maps  
 15 directly to biological entities and facilitates experimental tests and predictions. However such  
 16 models are complex, need many parameters, and are computationally costly. Here we introduce the  
 17 HillTau form for signaling models. HillTau retains the direct mapping to biological observables, but  
 18 it uses far fewer parameters, and is 100 to over 1000 times faster than ODE-based methods. In the  
 19 HillTau formalism, the steady-state concentration of signaling molecules is approximated by the  
 20 Hill equation, and the dynamics by a time-course *tau*. We demonstrate its use in implementing  
 21 several biochemical motifs, including association, inhibition, feedforward and feedback inhibition,  
 22 bistability, oscillations, and a synaptic switch obeying the BCM rule. The major use-cases for  
 23 HillTau are system abstraction, model reduction, scaffolds for data-driven optimization, and fast  
 24 approximations to complex cellular signaling.

25

26

## 27 **Author summary**

28 Chemical signals mediate many computations in cells, from housekeeping functions in all cells to  
 29 memory and pattern selectivity in neurons. These signals form complex networks of interactions.  
 30 Computer models are a powerful way to study how such networks behave, but it is hard to get all  
 31 the chemical details for typical models, and it is slow to run them with standard numerical  
 32 approaches to chemical kinetics. We introduce HillTau as a simplified way to model complex  
 33 chemical networks. HillTau models condense multiple reaction steps into single steps defined by a  
 34 small number of parameters for activation and settling time. As a result the models are simple, easy  
 35 to find values for, and they run quickly. Remarkably, they fit the full chemical formulations rather  
 36 well. We illustrate the utility of HillTau for modeling several signaling network functions, and for  
 37 fitting complicated signaling networks.

38

39

40

41 **Keywords:** Simulation, systems biology, mass-action, synaptic plasticity

42

43

## 44 Introduction

45

46 John von Neumann's elephant haunts mechanistically detailed models. von Neumann was reported  
 47 to have claimed that he could fit an elephant with 4 parameters, with the implication that models  
 48 with many parameters are under-constrained and over-fitted (Mayer, Khairy, and Howard 2010).  
 49 There are two major arguments to exorcise this elephant: that mechanistic detail is needed to  
 50 address certain kinds of questions; and that in the era of big data it is both easier and less biased to  
 51 simply build up detailed models with all the available pieces. Here we describe a model formalism,  
 52 the HillTau form, to help navigate between biological mechanisms and big data on the one hand,  
 53 and the desirability of condensed model representations that expose the key principles of system  
 54 function.

55 Cellular, and particularly synaptic signaling, is notoriously complex. There are an estimated 1400  
 56 protein species localized to the postsynaptic density alone (Bayés et al. 2011). These support a  
 57 range of functions including synaptic transmission, maintenance, plasticity, activity-driven protein  
 58 synthesis, metabolic control, and traffic (Upinder S. Bhalla 2014).

59 Mass-action chemistry is a common denominator for mechanistically inspired modeling of these  
 60 phenomena. This has the key virtue of defining specific biological entities (molecules) and  
 61 processes (reactions) that map directly to experimental observables. Many studies are based at this  
 62 level (U S Bhalla and Iyengar 1999; Shouval, Bear, and Cooper 2002). Further levels of  
 63 mechanistic detail include reaction-diffusion, stochastic chemistry mesoscopic stochastic methods  
 64 with trapezoidal or cubic meshes (Wils and De Schutter 2009; Oliveira et al. 2010) and even single-  
 65 particle reaction-diffusion calculations (Stiles and Bartol 2001; Andrews et al. 2010). Note that the  
 66 additional mechanistic detail comes at a considerable computational cost.

67 A few studies have found ways to lessen the level of detail, typically by focusing on interactions

without dynamics (e.g, (Sorokina, Sorokin, and Armstrong 2011)) or on dynamics with highly reduced interactions (e.g.,(Barak and Tsodyks 2006)). Model detail may also be abstracted out through model reduction, which starts from a detailed (usually mass-action or Michaelis-Menten ODE form) model and strips it down to core interactions needed to account for model behavior. Another reduction approach is to identify ‘fast’ reactions in the system, which settle much faster than the overall system, and can be replaced with algebraic relations(Hoops et al. 2006; Deuflhard and Heroth 1996). These are a subset of general approaches to model reduction using quasi-equilibrium and quasi-steady state methods (reviewed in (O. Radulescu et al. 2012)). There are several other model reduction techniques (reviewed by Snowden (Snowden, van der Graaf, and Tindall 2017)). Most of these methods retain the chemical kinetics formalism using ordinary differential equations (ODEs) to represent mass-action chemistry. Biochemical signaling models frequently suffer from incomplete parameterization. Thus ‘detailed’ models of signaling pathways, which are of course essential for many kinds of mechanistic analyses and design of experiments, are often under-constrained. In this context, a reduced model is preferable as it requires fewer parameters. One frequently used form specifies rate of change of concentration of each molecule as a weighted sum of input molecule concentrations, which may be passed through a sigmoid to achieve saturation (Savageau 2001; Nyman et al. 2020; Bray 1995). This form is quite similar to neural network models. Thus it lends itself to machine learning approaches to obtain parameters from systematic experimental time-series measurements (Nyman et al. 2020). The authors obtained relatively sparse interaction weight matrices, thus keeping down the number of parameters. While this formulation is effective at modeling dynamics of molecules in reaction networks, the resultant interaction matrices do not map directly to reaction pathways. Similarly, other formal approaches to model reduction yield very compact models, but the mapping to experimental observables may be quite indirect (Snowden, van der Graaf, and Tindall 2017). Hence it is useful to have a compact chemically-inspired formulation to serve as the core for the

93 model reduction while remaining easy to parameterize and predict using the same quantities that are  
 94 measured in experiments (Maurya et al. 2005; Danø et al. 2006; Taylor, Doyle, and Petzold 2008).  
 95 Indeed, a compact model with few parameters is arguably a better starting point to understand  
 96 complex signaling with insufficient data, than is a mechanistically detailed model.  
 97 Savageau and colleagues have developed the Design Space Toolbox to facilitate a systematic  
 98 approach to developing reduced signaling and transcriptional network models with specified  
 99 properties such as multistability (Lomnitz and Savageau 2016). They cast mechanistic models into a  
 100 Generalized Mass Action form, and this is then analyzed to realize the required phenotypic  
 101 repertoire. While this is an effective way of obtaining models with desired multi-state properties, it  
 102 differs in objectives from our goal of having a reduced, very efficient representation of dynamic  
 103 responses of complex reaction networks such as synaptic signaling.  
 104  
 105 Efficiency is a specific constraint in developing models of synaptic signaling. On the one hand,  
 106 many neural functions depend on the nuances of signaling. For example, network properties are  
 107 quite sensitive to different plasticity rules (Dan and Poo 2004), neuromodulators (Roelfsema and  
 108 Holtmaat 2018), and mutations (Südhof 2017). Network models also are expanding to include  
 109 diffusible messengers controlling cellular activity and blood flow (Dormanns, Brown, and David  
 110 2016). At the single-cell level, explorations of receptor insertion and clustering (Hudmon et al.  
 111 2005; Wilson et al. 2016), sequence recognition (Upinder S Bhalla 2017) and synaptic tagging  
 112 (Frey and Morris 1997; Smolen, Baxter, and Byrne 2012) all require some level of reference to the  
 113 chemical signaling. The crux of the problem arises when these studies need to scale beyond one  
 114 synapse to whole-neuron (up to  $10^4$  synapses, (Upinder S Bhalla 2017)) or even network scales  
 115 (e.g.,  $10^9$  synapses (Markram et al. 2015) ). Clearly, efficiency in memory and computations is  
 116 important for such models.  
 117

118 The HillTau form addresses several key concerns with modeling of complex signaling networks. It  
 119 utilizes only those observable states specified by the user to map directly to the chemistry, thus  
 120 supporting sparse models that are easier to constrain with limited data. This requires very few  
 121 parameters, yet behaves similarly to chemical cascades involving multiple intervening steps. Since  
 122 the user specifies their chosen observables, each can be related directly to observations of  
 123 concentration over time. The models are small and calculations are highly efficient, being closed-  
 124 form and event-driven.

## 125 Results

126 We first provide an overview of the HillTau algorithm. Then we illustrate its use to approximate  
 127 increasingly complex reaction networks. We then show how one can reduce a mass-action model to  
 128 its HillTau equivalent, with a tradeoff of greater complexity for better accuracy. Finally we carry  
 129 out some benchmarks of several reduced HillTau models against the original ODE-chemical kinetic  
 130 models run on two simulators, MOOSE (Ray and Bhalla 2008) and COPASI (Hoops et al. 2006),  
 131 and show that HillTau is orders of magnitude faster.

### 132 Overview of HillTau algorithm

133 The name HillTau comes from combining the Hill form for concentration-dependence of a reaction,  
 134 and *tau*, the time-course for settling to steady state. In brief, a ‘reaction’ in HillTau uses the Hill  
 135 equation with modifiers to estimate steady-state values  $Y_{\infty}$  of the product of one or several chemical  
 136 reactions having an input reagent  $Y_{input}$ , and a Ligand  $L$ , with order  $n$ :

$$137 \quad Y_{\infty} = Y_{input} \cdot L^n / (KA^n + L^n) \quad \text{Eq. i}$$

138 It may also optionally have a modifier  $M$ , with order  $h$ :

$$139 \quad Y_{\infty} = Y_{input} \cdot L^n / (KA^n (1 + M/K_{mod})^h / (1 + A_{mod} (M/K_{mod})^h) + L^n) \quad \text{Eq. ii}$$

140 A modifier changes the effective  $KA$  of a reaction, and is controlled by two terms.  $K_{mod}$  determines

141 the half-max concentration of the effect of the modifier.  $A_{\text{mod}}$  determines what effect the modifier  
 142 has on the reaction. If  $A_{\text{mod}} < 1$ , the modifier is inhibitory, else it is excitatory (Hofmeyr and  
 143 Cornish-Bowden 1997). The steepness of the effect of the modifier is controlled by its order,  $h$ .  
 144 The HillTau formulation of a reaction also incorporates  $\tau$ , the time over which the system  
 145 exponentially approaches this steady-state. We allow for different time-courses  $\tau$  and  $\tau_2$  when the  
 146 concentration is rising or falling:

147 If  $Y_{\infty} > Y(t)$   $(Y(t+\Delta t) - Y(t))/(Y_{\infty} - Y(t)) = 1 - \exp(-\Delta t / \tau)$  Eq. iii

148 If  $Y_{\infty} < Y(t)$   $(Y(t+\Delta t) - Y(t))/(Y_{\infty} - Y(t)) = 1 - \exp(-\Delta t / \tau_2)$  Eq. iv

149 This exponential form is a good and efficient approximation to the differential equation form for  
 150 reaction rates (Eq v), so long as the timestep  $\Delta t$  in Eqs iii and iv is smaller than  $\tau$  (See methods):

151  $Y'(t) = (Y_{\infty} - Y(t))/\tau$  Eq. v

152 The set of elementary HillTau reactions are illustrated in Figure 1, and the details of the calculations  
 153 are provided in the Methods section.

154 The motivation for this formalism is that the steady-state value of a cascade of binding reactions, or  
 155 of enzyme reactions with a fixed rate back-reaction, can be approximated by a Hill function  
 156 (Methods). Further, the time-course of approach to steady-state is typically governed by the slowest  
 157 reaction, and this can be approximated as an exponential settling function (Methods).

158 Note that we do not assume that the input, activator and modifier act in a single mass-action  
 159 chemical step. Indeed, HillTau is most effective for model reduction when one can fit several mass-  
 160 action steps using one HillTau ‘reaction’.

161 Since Equations i to iv are analytic, one can do this calculation in an event-driven manner. HillTau  
 162 achieves sparseness and simplicity by approximating many steps with a single ‘reaction’,  
 163 considering only those intermediates that are needed for readouts or for improved precision. It  
 164 achieves speed because the models are smaller, and by using event-driven calculations rather than  
 165 numerical integration.



Most reaction networks cascade through many layers of reactions. HillTau evaluates each upstream layer before downstream ones. It first builds a dependency graph of all reactions. This is done by identifying input molecules as layer 0, and successively ranking all reactions that depend only on layer 0 as layer 1, reactions that depend on layers 0 to 1 as layer 2 and so on.

HillTau identifies feedback loops by reactions which do not resolve into the above layers. Based on ordering of reactions in the model definition, it picks a reaction to ‘break’ the loop, and assigns it to layer N+1, where N was the previously deepest layer. It then repeats the process of layer assignment, including further loop-breaking if needed.

During evaluation of a single step in HillTau, all the steady-state and time-course calculations are completed for layer 1, then layer 2 is calculated, and so on. Thus each layer receives the inputs appropriate to the current time before doing its evaluation. In cases where update events are separated by periods greater than the shortest  $\tau$  in the system, additional time-steps are inserted to maintain accuracy (Methods). For typical use-cases, such as synaptic plasticity models, the event interval is shorter than the time-courses in the model (typically  $\sim 1$  sec) and hence only a single step is taken. In cases where HillTau inserts additional time-steps for accuracy, it is done behind the scenes of the same event-driven programming interface. If there is feedback, then again one has to use event intervals shorter than the shortest  $\tau$  in the feedback loop. A factor of 10 usually gives good convergence (e.g., Supplementary Figure S7 panels A and D).

In summary, HillTau uses analytic evaluation of reaction outputs based on a Hill-like form and exponential settling, and propagates the evaluation through successive layers of the reaction network for each event time. Events can be stimuli or points in a time-series for sampling system time-evolution.

## **The HillTau form can model a range of chemical signaling motifs**

We implemented a range of elementary chemical signaling functions to illustrate the use of the HillTau form (Methods, Figure 1). The HillTau versions of most of these reactions have an exact fit

191 to their mass-action counterparts (Supplementary Figure S1). We further implemented key signaling  
 192 motifs, including feedback inhibition, oscillation, and bistables (Figure 2). To do this, we  
 193 constructed minimal HillTau schemes that incorporated the essential elements of each of these  
 194 motifs. We developed an optimizer program *mash.py* (MASH: Model Abstraction from SBML to  
 195 HillTau, see Methods) to tune parameters of the HillTau models to match the outputs to the original  
 196 mass-action or ODE versions. MASH runs the reference model through a range of stimuli designed  
 197 to explore its input-output properties, and then uses numerical optimization methods from  
 198 `scipy.optimize` to tune parameters so that the HillTau model produces a good fit to the original. We  
 199 used normalized RMS difference between the traces as a measure of goodness of fit. In Fig. 2A-C  
 200 we compare feedback inhibition implemented in mass-action (5 reactions, 7 species, 2A), HillTau  
 201 (2 reactions, 3 species, 2B), and run for a square pulse input (2C). The feedback inhibition model is  
 202 well approximated by the HillTau version to within 4% normalized RMS deviation.

203 Next, we implemented a HillTau version of a mitogen-activated protein kinase (MAPK) feedback  
 204 oscillation model having 11 reactions and 15 species, Fig 2E (Kholodenko 2000). We used three  
 205 HillTau reactions to map to the key components of the original ODE model. First, we used a  
 206 reaction to represent the basic MAPK cascade. Second, we provided an output reaction to represent  
 207 the phosphorylation of the MAPK molecule by the cascade. While it was possible to use this output  
 208 signal to inhibit the cascade, we found we had to implement a separate reaction for the negative  
 209 feedback step to introduce a longer delay to match the observed oscillations.

210 Having constructed the model structure, we next fit the HillTau model to the original ODE model  
 211 using MASH. As initial parameter estimates, we used taus of the order of the oscillatory period, and  
 212 KA of the same order as the (known) molecular concentrations. We first fit the initial output  
 213 transients. Then we ran it for a complete cycle. Finally we stretched the fit time to include a few  
 214 cycles. This incremental increase in time was necessary because our RMS scoring function gives  
 215 very poor scores for otherwise good models if a phase mismatch builds up over a few cycles. The

216 final reduced HillTau version (3 reactions, 4 species, fig 2F) had similar period and amplitude (Fig  
217 2 D), and it fit the waveform to within ~7.6% normalized RMS deviation.  
218 Finally, we made a HillTau version of a chemical bistable switch using just 2 reactions (Fig 2 G).  
219 We demonstrated that the HillTau form works with the standard dose-response (null-cline)  
220 approach to estimating steady states (Figure 2 H) and showed that the resulting switch exhibits high  
221 and low states that are triggered by transient inputs (Figure 2 I).  
222 Thus the HillTau form can efficiently represent a range of important signaling motifs and their  
223 dynamics, including feedback inhibition, oscillations, and bistability.

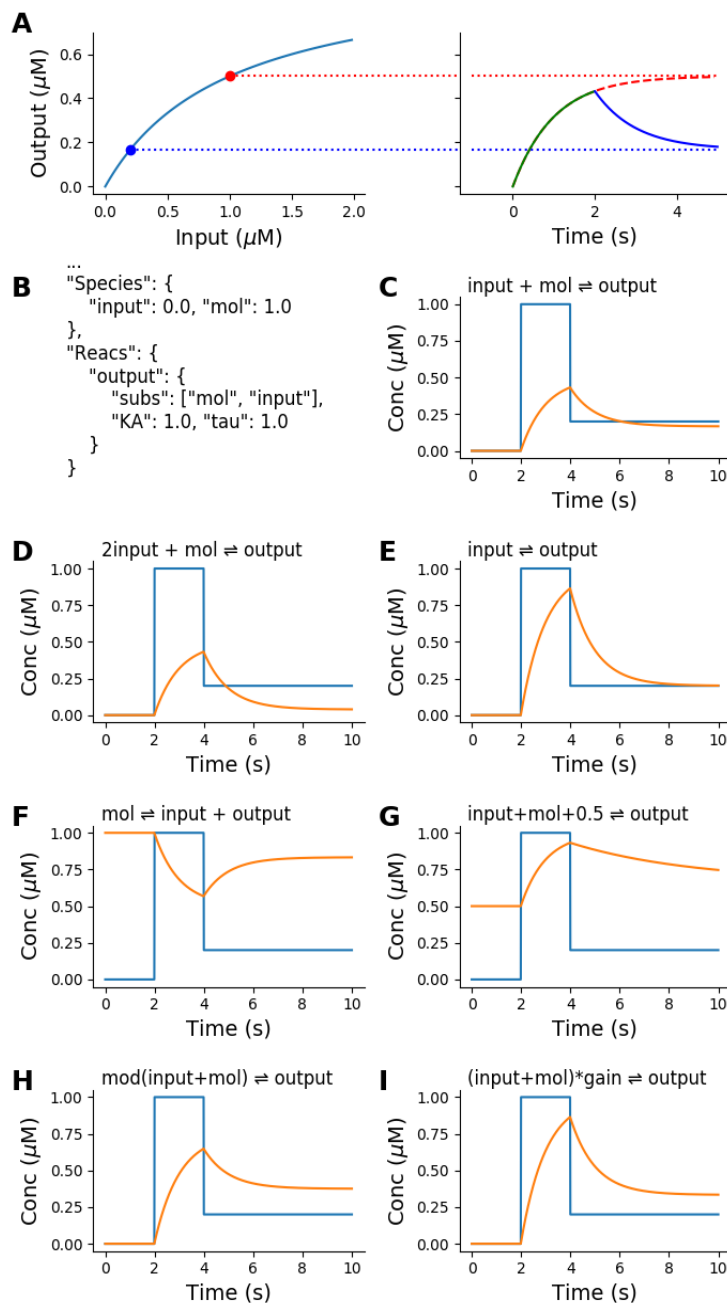

Figure 1. The HillTau formulation and representation of elementary chemical reactions by a single HillTau reaction.

A: Principle of HillTau formulation. Left: steady-state output values for different levels of the input molecule, computed by the Hill equation. In all simulations in this figure, two input values are used: first 1  $\mu\text{M}$  (red dot) and later 0.2  $\mu\text{M}$  (blue dot). Right: The simulator starts from the current value of the output, and computes the approach to the steady-state as an exponential time-course. Note that these are algebraic calculations, not numerical integration. In this example the output rises from zero toward the red dotted line for 2 seconds. Then the input is changed to 0.2  $\mu\text{M}$ , and now the simulator approaches the steady-state value for this (blue dotted line) with an exponential time-course. B: Key

232 section of the JSON code defining this reaction system. C-G: Inputs (blue) and simulated time-course of outputs  
 233 (orange) for seven different reactions. Each is represented by a similar HillTau reaction but with different parameters  
 234 (see Supplementary Material). In all cases the HillTau output onset is identical to the output computed using numerical  
 235 integration of a single reaction expressed as mass-action chemical kinetics. Decay time-course may differ from onset  
 236 time-course in mass-action. C: Binding. D: 2nd order binding. E: Conversion. F: Inhibition, conceptually equivalent to  
 237 removal of output molecules by binding of input to the output molecule, and sequestration of the resultant complex. G:  
 238 Variant of binding reaction, in which there is a fixed baseline of 0.5  $\mu\text{M}$ , and the system has different on ( $\tau = 1\text{s}$ ) and  
 239 off ( $\tau_2 = 5\text{s}$ ) time courses. H. Same as reaction 1, but with a modifier term that strengthens input affinity. I. Same as  
 240 reaction 1, but with a gain term that multiplies the output, in this case by a factor of 2.

241

242

243

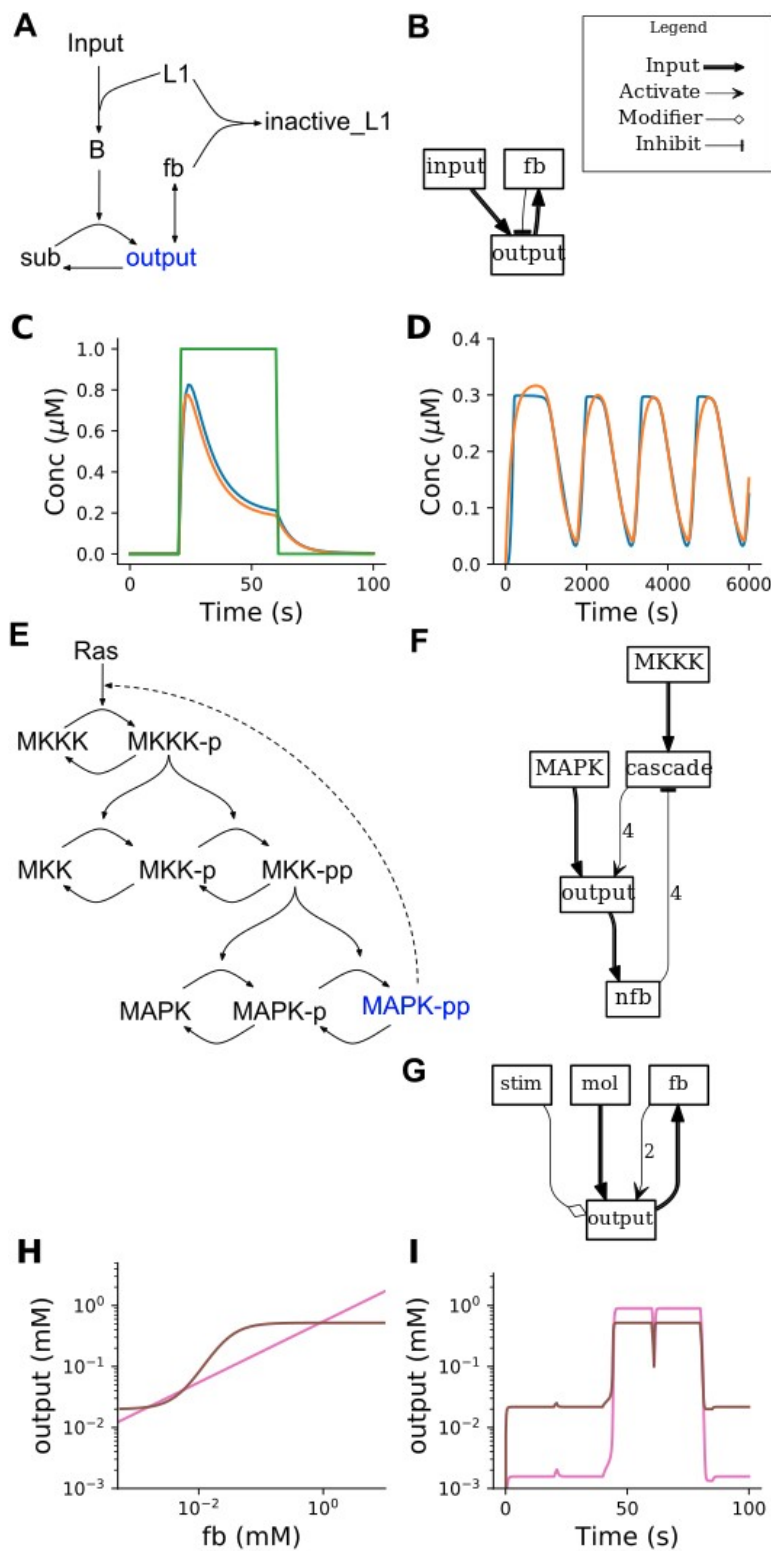

Figure 2. HillTau models of key signaling motifs. A-C: Feedback inhibition. A: Mass-action reaction scheme for feedback inhibition, involving 7 molecules and 5 reactions. B: HillTau version. Each box represents a molecule. If there are input arrows to the box it means there is a reaction whose product is the named molecule. Input arrows can be either

248 inputs (reagents), activators, inhibitors, or modifiers. This reaction consists of 3 molecules (input, *fb*, and output) and 2  
249 reactions (*fb* and output). C: Simulations for mass-action (blue) and HillTau (orange) versions of feedback inhibition.  
250 The green trace is the input molecule. D-F: Oscillator from ultrasensitive MAPK cascade, taken from (Kholodenko  
251 2000). D: Output of simulation. Blue is ODE output and orange is HillTau. E: ODE model. This uses 15 molecules, and  
252 11 reactions. MAPK-pp is the molecular species used as output of the oscillator. F: HillTau reaction scheme for  
253 oscillator, using 5 molecules and 3 reactions. The concentration of the ‘output’ molecule is plotted. G: HillTau model of  
254 bistable system, involving 4 molecules and 2 reactions. H: Phase plot showing stable states of system as the intersection  
255 points between the steady-state dose-response curves. This was generated by varying the feedback molecule *fb*, and  
256 measuring *output* (brown curve), and then varying the *output* molecule and measuring *fb* (pink curve). I: Time-series  
257 illustration of state switching in the bistable. As before, *output* is in brown and *fb* in pink. The Y axes of H and I are the  
258 same to show that the steady-state output levels (brown) match. The system starts in the low state. At 20 s a small  
259 excitatory input *stim* is given which fails to switch the state. At 40 s a strong input causes switching to the high state. At  
260 60 s a weak inhibitory input fails to turn it off, but at 80 s a strong inhibitory input returns the state to baseline.  
261 Excitatory and inhibitory inputs were delivered by transiently setting the level of *stim* to high or low values.

262

## 263 **The HillTau form compactly represents bidirectional synaptic plasticity**

264 Synaptic plasticity is one of the most-modeled neuronal signaling processes (U S Bhalla and  
265 Iyengar 1999; Lisman 1989). The key features that have been represented include stimulus strength-  
266 dependence, timing dependence, and long-term state storage (Upinder S Bhalla 2014). A few  
267 studies have come up with rather detailed models to implement each of these processes (Smolen,  
268 Baxter, and Byrne 2012; Hayer and Bhalla 2005; Kim et al. 2013). As an illustration of all these  
269 properties in the HillTau system, we implemented bidirectional synaptic plasticity including long-  
270 term synaptic state changes (Figure 3). One of the interesting aspects of synaptic plasticity is that in  
271 many systems, the same input modality (typically read out as  $\text{Ca}^{2+}$  concentration) can give rise to  
272 both synaptic depression and potentiation. This has significant theoretical implications and an  
273 abstract rule for this bidirectional plasticity was proposed by Bienenstock et al (the BCM rule,  
274 (Bienenstock, Cooper, and Munro 1982)). We first devised a simplified mass-action version of the  
275 BCM rule using 9 molecules and 6 reactions (Figure 3A). The species p\_AMPAR is the  
276 phosphorylated form of the receptor, assumed to be inserted into the synapse. Here, resting  $\text{Ca}^{2+}$   
277 does not alter the state of the model; low  $\text{Ca}^{2+}$  causes depotentiation (that is, reduction of receptor  
278 levels), and high  $\text{Ca}^{2+}$  causes potentiation (Figure 3C, D, E). We then implemented a BCM model in  
279 just 3 reactions in HillTau (Figure 3B). We used the program *mash.py* to fit the HillTau model to  
280 the reference mass-action version using a set of generic time-series and dose-response stimuli  
281 (Methods). We obtained a normalized RMS fit of ~2.3%. When we used the fitted model for Figure  
282 3, we obtained fits of ~5.2%, 8.9% and 2.3% for panels C, D and E respectively even though the  
283 model had not been tuned to these stimuli. As a further elaboration, we introduced a bistable switch  
284 for long-term retention of synapse state, which was driven bidirectionally by the BCM rule (Figure  
285 3F). The bistable switch, derived from Calcium-calmodulin Type II kinase (CaMKII) signaling,  
286 controls receptor insertion. Using this model we delivered a typical potentiating stimulus (strong but  
287 brief  $\text{Ca}^{2+}$  input), leading to sustained synaptic AMPAR elevation. We followed this with a typical



288 long-term depression stimulus (modest but sustained  $\text{Ca}^{2+}$  input), which turned the switch off again  
 289 and led to reduction in AMPAR (Figure 3G). This composite model required 4 reactions and one  
 290 summation function in the HillTau form. Several mass-action models of synaptic state switches  
 291 include these elements (e.g., (U S Bhalla and Iyengar 1999; Lisman 1989; Hayer and Bhalla 2005;  
 292 Singh and Bhalla 2018)) and they typically involve far more molecules and reactions (e.g., the  
 293 Hayer and Bhalla 2005 model used 133 molecules and 215 reactions (Hayer and Bhalla 2005)).  
 294  
 295 Overall, these examples illustrate how compact HillTau models can represent both the bidirectional  
 296 induction of plasticity, and also long-term maintenance of synaptic state.

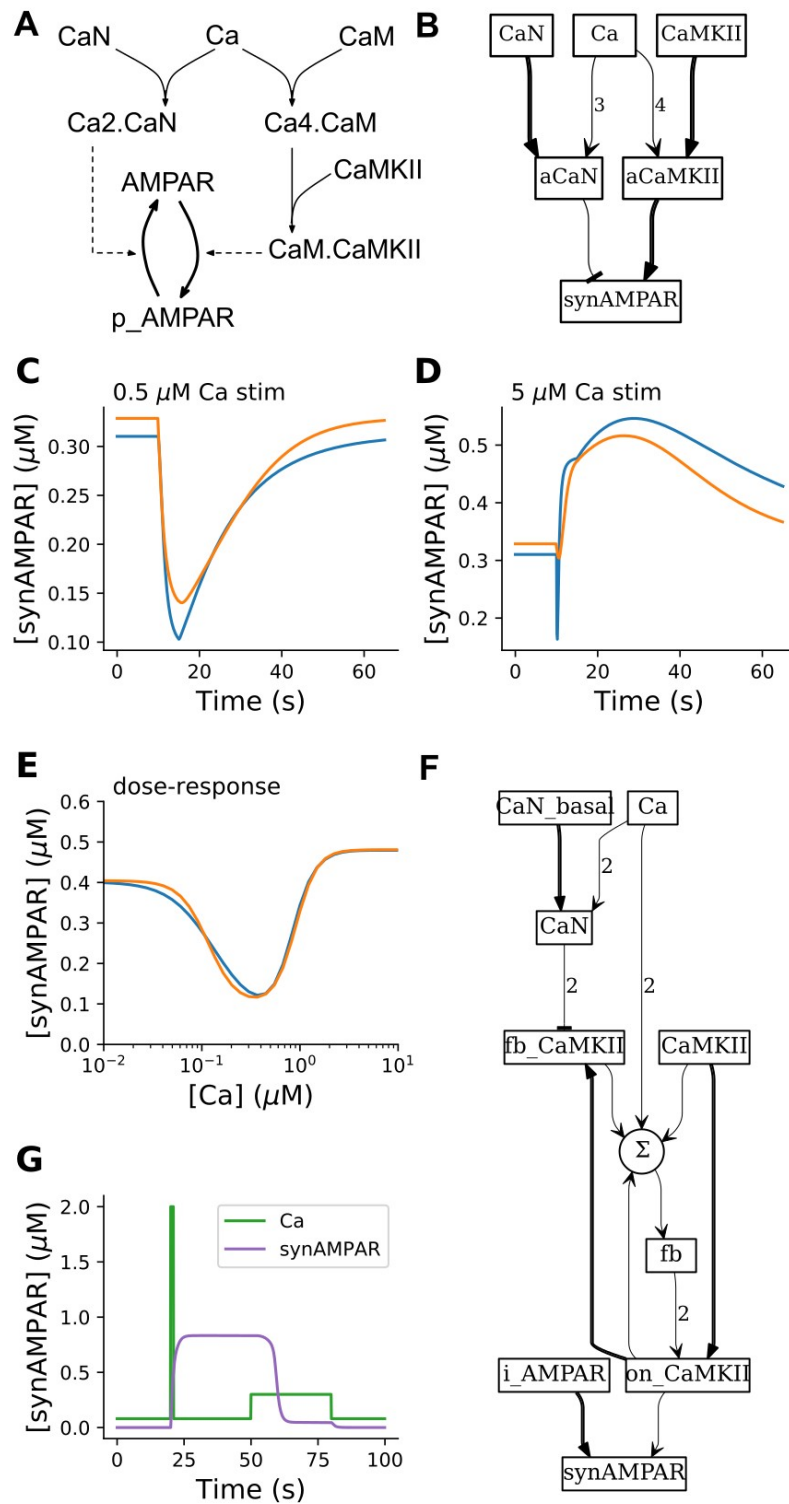

298

299 Figure 3: HillTau version of synaptic plasticity rules. A. Mass-action model for generating Beinenstock-Cooper-Munro  
300 (BCM) rule for synaptic plasticity. p\_AMPAR is the phospho-receptor, and is the output of the model. It is assumed to  
301 localize to the synapse and is thus also referred to as synAMPAR. Calcium triggers both an inhibitor (Calcineurin, CaN)

and a stimulus (CaMKII) for receptor phosphorylation and insertion into the synapse. CaN activates at lower  $[Ca^{2+}]$ , so there is initially a reduction in p\_AMPAR. CaMKII is present at very high levels, so at higher  $Ca^{2+}$  it out-competes CaN to give an increase in p\_AMPAR. B. BCM rule implemented in HillTau. Here the species synAMPAR is the output of the model. C-E: Comparison of mass-action model p\_AMPAR with HillTau model synAMPAR. Orange is HillTau, blue is mass action. C: 1s stimulus at  $0.5 \mu M Ca^{2+}$  gives a reduction in synaptically localized AMPAR (synAMPAR). D: 1s stimulus at  $5 \mu M Ca^{2+}$  gives an increase in synAMPAR. E: Dose-response curve of steady-state synAMPAR as a function of  $[Ca^{2+}]$  for mass-action (blue) and HillTau (orange) models. In both cases settling time for each point was 1000s. F: Schematic for BCM rule model feeding into bistable model, implemented in HillTau. The circular node labeled  $\Sigma$  represents weighted summation of multiple inputs. G: time-course of simulation of bidirectional plasticity using different  $Ca^{2+}$  stimuli. At  $t = 20$ , a 1s stimulus of  $2 \mu M Ca^{2+}$  (green trace) causes a transition to the active state, using synaptic AMPAR (maroon trace) as a readout. At  $t = 50$ s, a 30s stimulus of  $0.3 \mu M Ca^{2+}$  pulls the system back to resting state.

## HillTau models can be optimized to fit biochemical measurements

The above examples illustrate how HillTau can represent biological signaling motifs, and build them up into networks with interesting computational properties. We next approached a complementary problem in signaling, namely, to take a complex signaling system, and fit simple HillTau models to it. This provides a way to perform model reduction and to infer computational properties. The basic flowchart is illustrated in Figure 4. This flowchart addresses both the heuristics of defining model topology, and of parameter fitting.

The heuristics for defining model topology are as follows.

1. Identify inputs and key readout molecules. These readouts may be important (and experimentally measured) intermediate signaling molecules in a reaction network, or the end-products of a cascade.
2. Assign a reaction for each readout molecule, with an input as an upstream substrate or inactive

328 state of the molecule, an activator (or inhibitor, see methods) and optionally, a modifier. Together  
 329 these control the level of the readout molecule.

330 3. In case a molecule has multiple inputs, bring in additional reaction steps based on the known  
 331 reaction mechanisms. For example, if we have BDNF, EGF and Ca all controlling ERKII activity,  
 332 then we could specify an intermediate step where the two receptor tyrosine kinase ligands converge,  
 333 and this combination is an activator for the ERKII reaction with Ca as a modifier.

334 4. In case a readout is simply the sum of multiple active states of a molecule, use an equation to  
 335 define this summation.

336 5. Obtain best model fit as per flowchart in Figure 4. If model accuracy does not meet criteria for  
 337 your objectives, identify poorly performing intermediate readouts and insert further intermediate  
 338 reaction steps.

339 Note that in principle many of these steps can be automated. For example, one can generate a  
 340 family of models algorithmically (e.g., Ramakrishna and Bhalla 2008) and optimize over topology  
 341 as well as parameters, but this is out of the scope of the current study. Other algorithmic approaches  
 342 for model reduction are discussed in (O. Radulescu et al. 2012).

343 In the current paper we have used the above heuristics to generate HillTau schemes (model  
 344 topology) by hand.

345 There are also simple steps to obtain initial parameter estimates for each HillTau ‘reaction’:

346 1.  $K_A$  from the activator concentration at half-maximum of the experimental activation curve, or  
 347 directly from mass-action model rates.

348 2. Time-course  $\tau$  from the experimental time-course of the reaction, or from the slowest  
 349 intermediate step of a mass-action model. If there is a distinct time-course when the reaction turns  
 350 off, use this as  $\tau_2$ .

351 3. When the modulator is present, assign  $K_{mod}$  and  $A_{mod}$  from the half-maximum and the  
 352 steepness of modulation curve.

353

354 This approach works in the same way for model construction from experimental response curves,  
 355 and for model reduction from response curves taken from detailed models. Following generation of  
 356 an initial, roughly parameterized HillTau model, we can deploy the model fitting approaches  
 357 described in FindSim (Viswan et al. 2018). In brief, FindSim provides a Python-based framework  
 358 for matching models to experiments. It codifies the experiment design (e.g., time-series, dose-  
 359 response, bar-chart) and experimental results into a single machine-readable file. FindSim runs the  
 360 experiment on the model and returns a numerical score for goodness of fit. The model may be  
 361 defined in SBML (run using MOOSE) or using HillTau. Thus FindSim can be used as the scoring  
 362 function for optimizing model fit to experiments using a variety of optimization methods available  
 363 in `scipy.optimize`.

364 For the special case of model reduction, where we already have a detailed SBML model and wish to  
 365 fit a reduced, HillTau version, the utility MASH provides a shortcut alternative to the FindSim and  
 366 optimization pipeline (discussed above and in the Methods section).

367

368

369

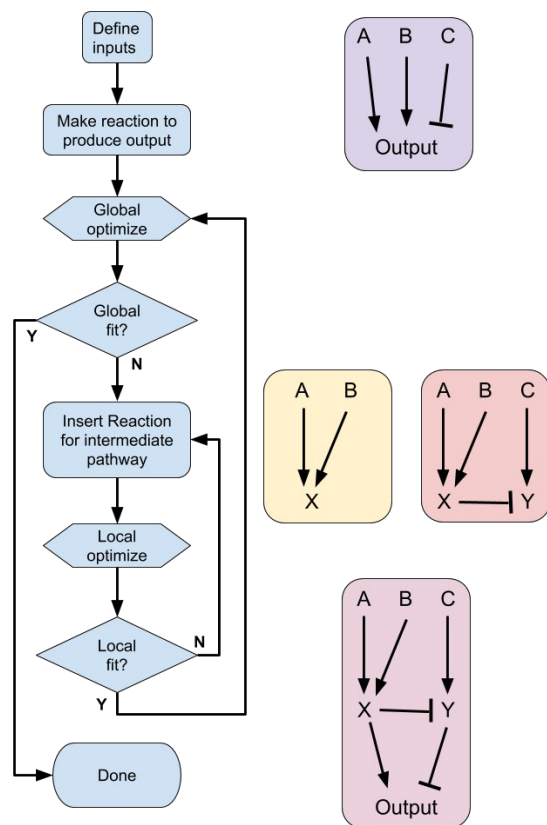

Figure 4: Flowchart for model building using HillTau. Left: flowchart. Right top: initial reaction with inputs A, B, and C. Right middle: successive local increments to model, introducing reactions X and Y respectively. Right lower: Final HillTau scheme with good fit at all stages.

As an example of this flowchart and the use of HillTau fitting to match an existing, detailed chemical ODE model, we derived a HillTau model of synaptic activity-triggered protein synthesis. Our reference data was obtained by running a series of ‘experiments’ on a published model implemented in mass-action kinetics (Jain and Bhalla 2009). The original model was based on numerous experiments, and included 123 molecules and 120 reactions (Fig 5A). The input pathways were  $\text{Ca}^{2+}$  and brain-derived neurotrophic factor (BDNF), and the final output was protein synthesis rate.

We started with the most reduced form, a single reaction to replace the entire synaptic protein

382 synthesis network. We specified amino acids as the input, BDNF as an activator, Ca as a modifier,  
383 and protein as the product of this reaction, (Fig 5B) to obtain our starting reduced model. We used  
384 MASH to carry out the optimization (Methods). In a model with a single reaction, MASH obtained  
385 a fit of about 11% normalized RMS. This is remarkable for such a simple model. It does well with  
386 the dose-response experiments (Scores of 7% and 5%, Supplementary Fig 5.1). However, it does  
387 not do a good job of replicating the dynamics of the experimental data, achieving scores in the  
388 range of 10% to 42%. (Supplementary Fig 5.1). We therefore increased the HillTau model detail.  
389 To do this, we introduced two additional key intermediates into the HillTau model: S6K, and  
390 CaMKIII. We first made a HillTau model involving inputs to S6K alone. Based on the known  
391 pathway, we chose BDNF as the activator, and Ca as the modulator for S6K. The S6K responses to  
392 combinations of these two inputs were used in MASH to obtain a fit to within 3.3% (Individual  
393 panel fits were between 3% and 22%, see Supplementary Fig 5.2). We then held S6K parameters  
394 fixed while we fit CaMKIII. CaMKII is activated by Ca, and modulated by S6K. MASH gave a  
395 CaMKIII fit of 1.9% (Individual panels 2% to 20% but most of the poor scores were small  
396 differences at baseline; Supplementary Fig 5.3).

397 Collectively, the optimizations for S6K and CaMKIII correspond to the inner loop of Figure 4.  
398 Finally, we added a final protein synthesis reaction that took the already fitted S6K and CaMKIII  
399 activity as activator and modifier. We held the earlier reactions (S6K and CaMKIII) fixed, and  
400 optimized only the protein synthesis reaction. After this, the composite model fit the optimization  
401 waveform in MASH to within 3.2% (normalized RMS), and the figure panels fit within a mean of  
402 9.3% (Fig 5D-K).

403 At this stage one could choose to perform further optimization in a couple of ways. We could have  
404 obtained closer fits had we optimized to the same stimuli as in the figure panels. Instead we used  
405 more general input time-series and dose-response stimuli to the MASH optimizer to see how well  
406 the model would generalize. This gives a HillTau model that behaves well across a wider range of

conditions than the experiments in figure 5. Second, there is a small systematic difference in baseline in panels 5F and 5G arising from a difference in output at resting BDNF, seen in panel 5I. The introduction of additional intermediate reactions in the model as per Figure 4 could further improve the fit. Such tradeoffs between generality, accuracy, and model complexity are common, and given that HillTau is meant for building compact models we considered this fit sufficiently good for illustration.

Overall, the abstract HillTau model captures many of the key properties of the mass-action system. These include steady-state and time-series responses of two inputs (BDNF and Ca), and three readouts: S6K, CaMKIII, and the end-product protein (Supplementary Fig 5.2, Supplementary Fig 5.3 and Fig 5 respectively). This is a highly effective dimension reduction, from over 360 to 31 parameters.

It is important to note that the efficiency of HillTau made the optimization calculations quite tractable. In the final optimization run for the entire model, the single reference ODE run took ~60 seconds, and the cumulative time for 746 HillTau evaluations was around 18 seconds. The optimization algorithm itself took about 75 seconds, excluding function evaluations.

Can we create a reverse mapping from these simplified HillTau models to ODE forms? A close but not exact mapping is obtained by taking the small-time limit of the HillTau event-driven form (Equations 3.x) and converting to an ODE (rate) form (Equations 4.x). ODE equations are supported by many systems biology simulators. It is not an exact mapping because HillTau may use different values for rising and falling time-courses ( $\tau$  and  $\tau_2$ ), whereas the ODE form can accommodate just a single value,  $\tau$ . We implemented this conversion in a program, *ht2sbml.py*, which is provided on the GitHub repository for HillTau. Using this mapping we were able to export HillTau to SBML, and tested that SBML-capable simulators such as COPASI could run the reduced, ODE form models, and give approximately matching results (Methods, Supplementary Figure 5.4). Thus we can use the HillTau toolchain to make reasonably reduced ODE models,



432 though these are neither as efficient as their HillTau counterparts, nor do they have the same  
 433 capabilities to use two time-courses to improve model fitting.  
 434 In summary, we developed a systematic procedure for developing reduced HillTau models to fit  
 435 mass-action simulations, including a model optimization utility MASH. We illustrate this procedure  
 436 by developing a HillTau model of 10 molecules and 4 reactions to fit a mass-action model having  
 437 123 molecules and 120 reactions. The resultant HillTau models generalize well and the fit improves  
 438 when intermediate reaction steps are added.

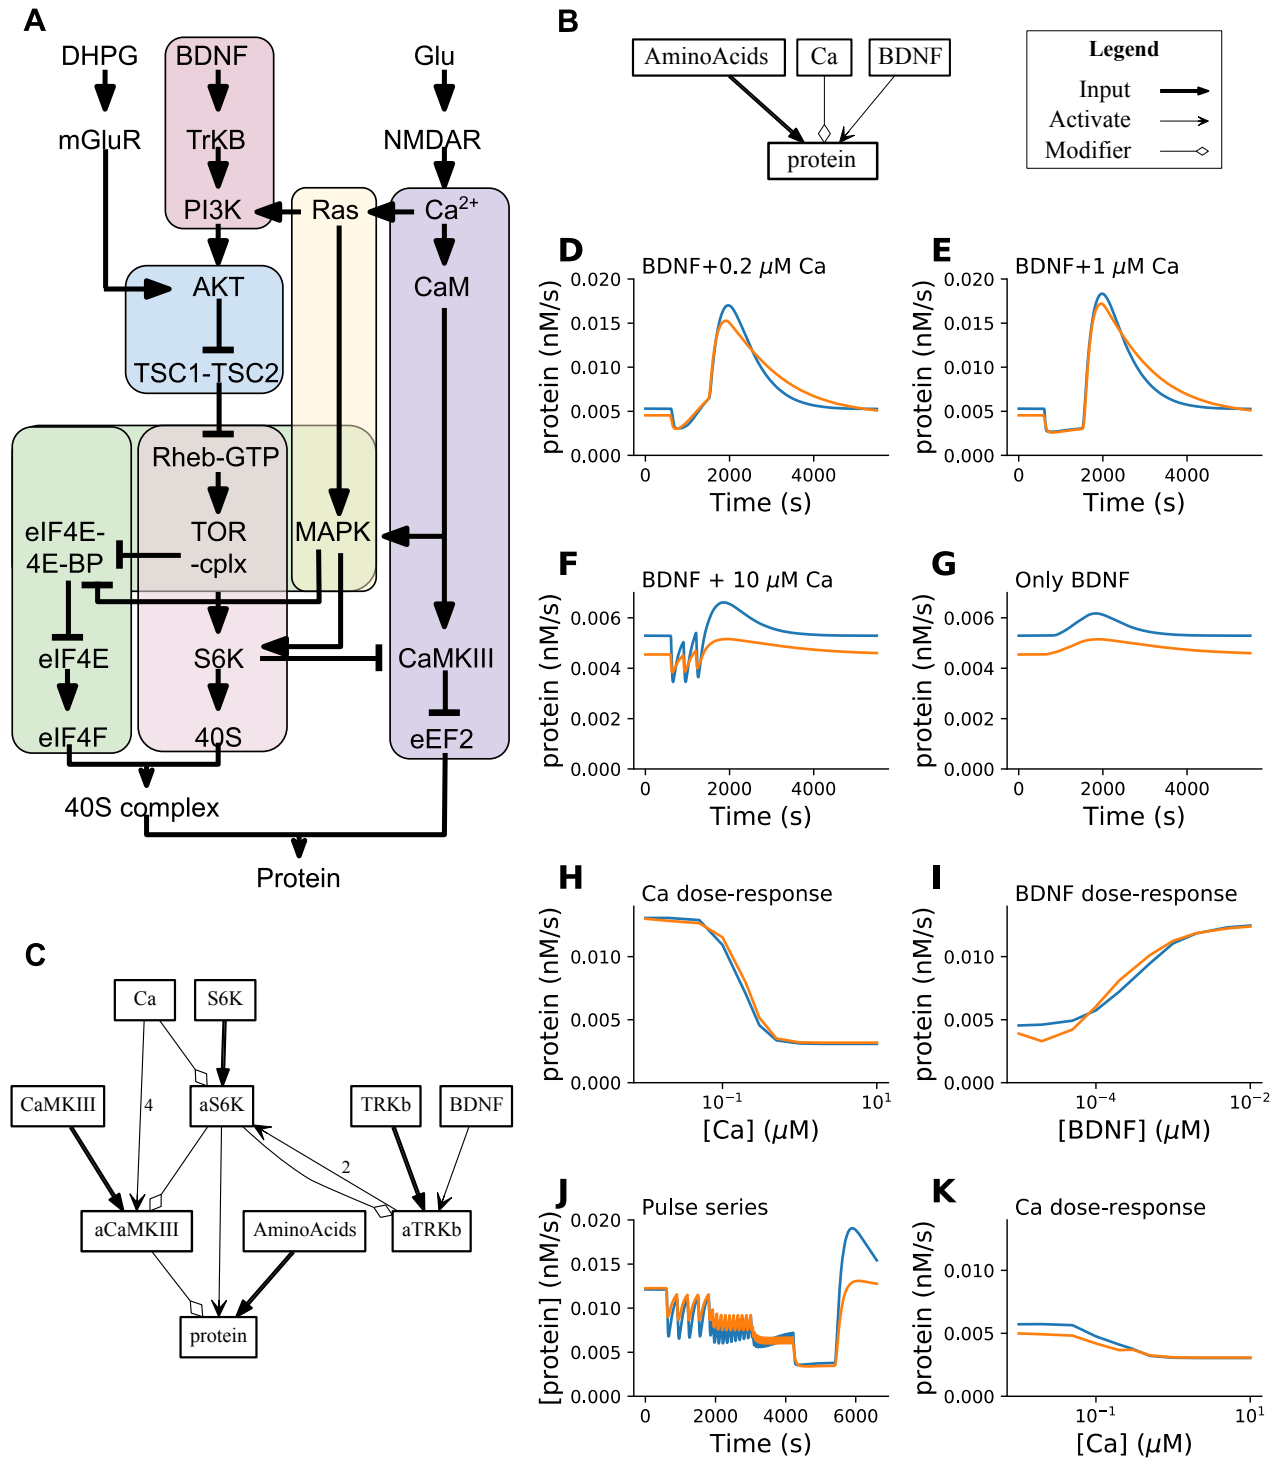

440

441 Figure 5: Model fitting and model reduction. A: Block diagram of source model with 123 molecules and 120 reactions,

442 from (Jain and Bhalla, 2009). B: First pass reduced model in HillTau, with 1 reaction and 4 molecules. C: Final reduced

HillTau model including activated S6K (aS6K) and activated CaMKIII (aCaMKIII) as intermediate readouts which also were fit to data. This model has 4 reactions and 10 molecules. D-K: Eight ‘experiments’ on reference and HillTau models, not part of stimulus set used to tune parameters for HillTau version. In all cases protein production rate is readout. Blue plots are reference, orange are HillTau. D: BDNF@3.7 nM + Ca<sup>2+</sup>@0.2 μM, 900 seconds. E: BDNF@3.7nM, Ca<sup>2+</sup>@1μM. F: 3 pulses of BDNF@3.7 nM for 5s, coincident with Ca<sup>2+</sup>@10μM for 1s, pulses separated by 300 s. G: Same as F, but Ca<sup>2+</sup> held at baseline of 0.08 μM. H: Dose-response of protein vs. Ca<sup>2+</sup>, holding BDNF fixed at 3.7 nM. I: Dose-response of protein vs BDNF, holding Ca<sup>2+</sup> fixed at 0.08 μM. J: Protein production rate for fixed BDNF@3.7 nM, where Ca<sup>2+</sup> was given in 1 second pulses at intervals of 300, 120, 60 and 10 seconds; each pulse sequence lasting for 1200 s. . K: Dose response of protein production rate vs. Ca<sup>2+</sup>, holding BDNF at basal levels of 0.05 nM. The average normalized RMS difference across the eight ‘experiments’ was under 10%, and in all cases the qualitative properties such as direction of change, matched well.

## HillTau models are compact and efficient

We next took a set of HillTau models of various levels of complexity, and compared various measures of computational cost with the ODE equivalents (Table 1, Figure 6.)

We first compared model complexity, measured as the number of parameters needed to specify the model. The number of parameters scales roughly as

*# of molecular species + 2 \* # of reactions.*

This is a slight overestimate, since some of the molecules are state variables and we do not need initial concentration values for them. Here we consider state variables to be those which are computed, as opposed to defined using initial conditions. In ODE models we estimate this by counting the number of rate terms plus the number of molecular species with a non-zero initial value. In HillTau models we count the rate terms and the species which are not reaction outputs. This yields the approximate scaling terms below. Each reaction needs two parameters,  $K_f$  and  $K_b$

for conversion reactions, and  $K_m$  and  $k_{cat}$  for enzymes. We sampled from among the mass-action models presented in the above sections, ranging from 3 to over 360 parameters, and included an additional model with almost 750 parameters. (Fig 6A). The HillTau form had a similar scaling with molecules and reactions, except that HillTau also allows for a number of optional terms in the reactions so the average scaling is somewhat larger than  $2 * \# \text{ of reactions}$ . We found that the HillTau form became increasingly effective at model reduction for larger models. Note that here the optimization goal was to obtain a single end-point response (3 end points in the case of the model in Figure 5). Further reactions would be needed to also represent intermediate pathway readouts.

We then examined run-time efficiency. We took run-times for two ODE simulators, MOOSE and COPASI, whose numerical cores are in C++. We compared these with matching HillTau models run using the C++ version of HillTau (Methods, Figure 6B). For small models, HILLTAU was typically about 100 times faster than the ODE calculations, but for large models HillTau became over 3 to 4 orders of magnitude faster (Figure 6B). This set of HillTau models fit their ODE counterparts within 3 to 9% accuracy, but note that the approximations were inherent in the HillTau model structure, and did not arise from lack of numerical convergence. The run-time for HillTau models grew with the number of parameters (Fig 6C, slope =  $0.015 \mu\text{s/s}$ ,  $R^2 = 0.79$ ), but also had a dependence on model stiffness due to the requirement that the internal timestep should be smaller than the smallest  $\tau$  in the model. This suggests that the HillTau calculation cost could be further improved by utilization of a variable-timestep similar to methods for ODE solutions frequently used for chemical kinetic calculations.

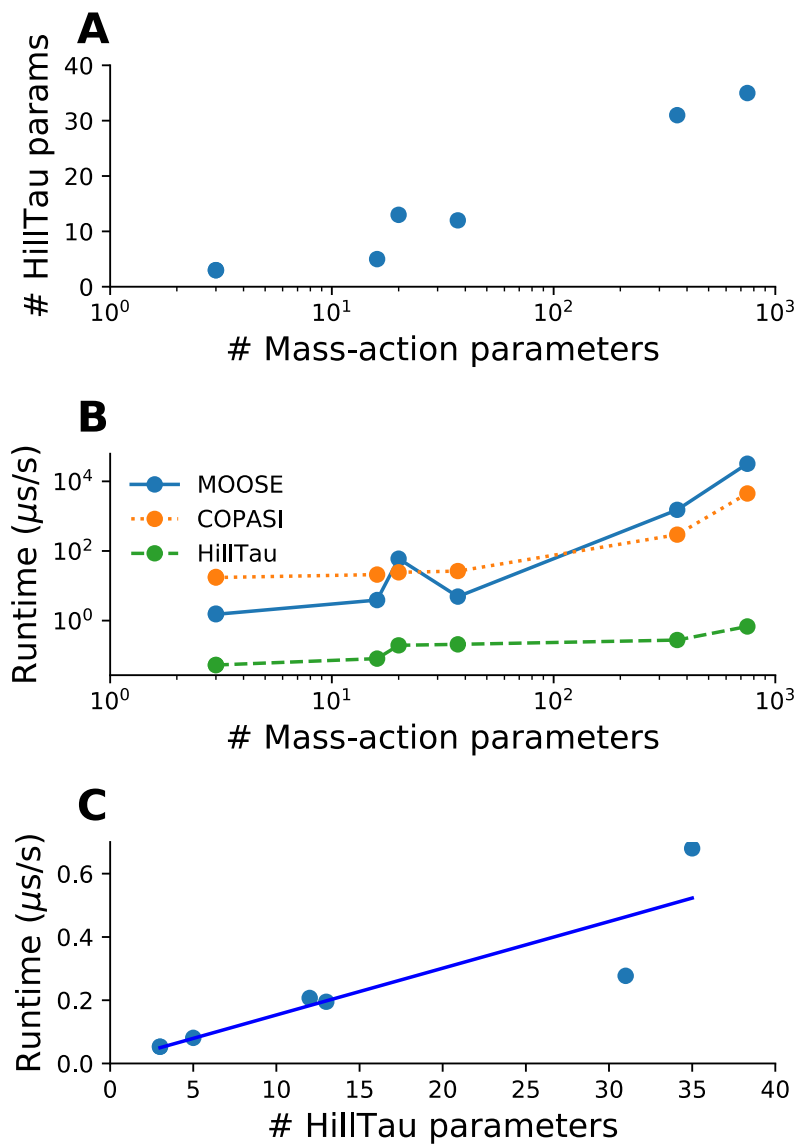

Figure 6. Efficiency of HillTau method. A. Scaling of number of parameters. The HillTau form uses far fewer parameters than mass-action, and becomes relatively more concise with larger models. B, C: run-time scaling. All run-times are expressed in  $\mu\text{s}$  of wall-clock time to execute 1 second of simulation time. Calculations were done on an Intel(R) i7-7700HQ processor, running Ubuntu 18.04. B. Comparison of run-times of the HillTau and mass-action forms, where the numerically intensive sections of HillTau were implemented in C++, and C++ was also used for ODE calculations in two simulators: MOOSE and COPASI. Due to the combination of model reduction and efficient calculation, HillTau has a huge efficiency advantage which grows to over 3 orders of magnitude for larger models. The accuracy with which this set of HillTau models fit their ODE counterparts was in the range 3 to 9%. C. HillTau model run-time increases with number of parameters.  $R^2 = 0.79$ , slope = 0.015, intercept = 0.006, units in  $\mu\text{s/s}$ .

499

500

501 Dose-response experiments are particularly efficient to compute using HillTau. An inefficient way  
502 to do these for ODE models is to run them out to steady-state for each successive dose. This may  
503 take a long while especially if the system is stiff or converges slowly. It is also possible to use linear  
504 algebraic root-finding to find the steady-state value in one step, possibly following a short  
505 presimulation to bring the system closer to the steady-state (Clarke, Bruce L. 1981; Hindmarsh et  
506 al. 2005). In HillTau, the form itself incorporates the steady-state value, so in principle one could  
507 leap to the steady value in one step. To be more conservative, the HillTau does so in 10 steps to  
508 smooth out transients and to allow any feedback signals to propagate through the system. As an  
509 illustration, COPASI performed the steady-state calculation for a large model (accession 92,  
510 DOQCS, ~100 reactions, (Jain and Bhalla 2009)) in ~1 second after some relaxation of convergence  
511 criteria. The HillTau equivalent model (same as final model in Fig 5) took about 4 microseconds.  
512 Overall, HillTau models are compact and highly efficient compared to ODE-solved mass-action  
513 models. The efficiency improves for larger models.

514

## 515 Discussion

516 We have designed HillTau, a compact, computationally efficient abstraction of chemical signaling  
517 that is particularly effective in building reduced models of complex signaling networks. It uses an  
518 event-driven algebraic representation based on the Hill equation and exponential relaxation to  
519 steady state. HillTau is effective in representing a range of chemical signaling motifs and complex  
520 synaptic models, using biological observables of molecules, reactions, association constants and  
521 time-courses. We show its applicability for model reduction by optimizing the fit of its responses to

522 those of a reference mass-action model. This generates very compact models. A similar  
 523 optimization approach works to build a HillTau model directly from experimental data. Thus  
 524 HillTau addresses many of the concerns of model-building with limited data, and serves as a  
 525 scaffold for eventual development of more detailed models.

526

527 HillTau is phenomenological and semi-heuristic, in that it uses the Hill equation to achieve  
 528 concentration dependencies that fit well, but ignores many intervening chemical steps. This  
 529 combination gives it the strong points indicated above, namely speed, compactness, and consistent  
 530 mapping to experimental observables, but it also sets out clear limitations. Foremost among these is  
 531 that it can only make limited predictions on detailed pathway chemistry, since it is missing many  
 532 reaction steps. For example, a HillTau model would be limited in its ability to predict drug targets  
 533 or side-effects because it may have lumped together potential molecular targets into a single  
 534 reaction step. It is, however, quite effective in representing and predicting emergent signaling  
 535 properties because it captures dynamics and topology of signaling networks.

536 The current HillTau formulation is limited in its handling of two important aspects of signaling in  
 537 neurons: stochasticity and diffusion. These phenomena are out of the scope of our current  
 538 implementation, which has focused on development, validation, simplicity and speed. Many  
 539 biochemical signaling processes experience substantial stochasticity, particularly in small-volume  
 540 systems such as the synapse which is a target of our modeling. One possible way to introduce  
 541 stochasticity would be through the linear noise approximation of the chemical Langevin equation  
 542 (Wallace et al. 2012), which if used in an event-driven manner could be quite efficient. We  
 543 anticipate it will take extensive validation to establish its utility in the HillTau framework.

544 Similarly, there are potential ways to elaborate upon HillTau to use an event-driven approximation  
 545 to diffusion, but these will require later follow-up.

546 Based on these attributes, we discuss four major use-cases for HillTau: model reduction, system

547 abstraction, scaffolds for data-driven optimization, and efficient approximations to complex cellular  
548 signaling.



549

## 550 **Model reduction**

551 Several algorithmic approaches have been brought to bear on the *model reduction* problem,  
 552 including collapsing multiple mass-action steps into one (Ovidiu Radulescu et al. 2008), and power-  
 553 law generalizations of mass-action signaling (Savageau 2001). Simulators such as COPASI provide  
 554 utilities for partitioning a reaction system into fast and slow reactions, thus allowing one to  
 555 approximate the fast steps with their algebraic counterparts (Hoops et al. 2006; Deuflhard and  
 556 Heroth 1996). In our test model (Accession 92, DOQCS, (Jain and Bhalla 2009)) we were able to  
 557 partition about 80% of the steps into the fast domain (<100 s) using the ILDM method implemented  
 558 in COPASI. With HillTau one can use a well-known heuristic/optimization approach to simplifying  
 559 large networks (Quaiser et al. 2011; Apri et al. 2014). This reduced the same test model down to 4  
 560 reactions, about 25-fold (Figures 4, 5). The approach reported in our current study relies on the  
 561 modeler starting from a minimal input-> output mapping, then iteratively picking relevant major  
 562 nodes in the network, and optimizing each subset of the model to fit the data (Figure 4).

563

564 Thus one can converge on the minimal set of intermediate nodes (illustrated in Figures 4 and 5, and  
 565 Supplementary Figures S5.1, S5.2. and S5.3) to achieve the desired accuracy of model fit to data.  
 566 Like other model reduction approaches, this minimal set of nodes is a compromise between  
 567 available data and model accuracy (Snowden, van der Graaf, and Tindall 2017). Unlike several  
 568 other reduction approaches, HillTau retains a direct mapping to observable biological entities.  
 569 Indeed, the HillTau representation of a signaling node may be closer to the conventional intuition  
 570 based on pathway schematics, than is a full mass-action reaction representation. Like pathway  
 571 diagrams, each HillTau reaction receives excitatory, inhibitory and modulatory inputs. A further  
 572 point of similarity is the HillTau models may condense several intermediate steps into a single  
 573 node on the reaction network. A more subtle point of similarity is that pathway block diagrams

574 typically assume implicit back reactions and decay of activity when stimuli are removed. This too is  
 575 built into how HillTau reactions work. In contrast to these simple mappings from pathway diagrams  
 576 to the HillTau form, it is often difficult to map between signaling diagrams and the full mass-action  
 577 reaction schemes (Upinder S. Bhalla 2002; Upinder S Bhalla 2003). While previous model  
 578 reduction studies have worked on different pathways than the synaptically biased set explored in  
 579 our study, a comparison with the survey of methods in (Snowden, van der Graaf, and Tindall 2017),  
 580 suggests that HillTau achieves as good or better model reduction for large models than most other  
 581 methods.

582

## 583 **System abstraction**

584 Next, *system abstraction* and functional modules help to make sense of complex biological  
 585 signaling. We propose that HillTau forms a useful tool for arriving at functional modules in  
 586 complex signaling networks. Such modules have long been considered a conceptual basis for  
 587 understanding complex signaling (U S Bhalla and Iyengar 2001). Typically they have been  
 588 ascertained by manual inspection and dynamical analysis of components of signaling networks, for  
 589 example, the nested feedback loops in the cell cycle (Novák and Tyson 2004). A more scalable  
 590 approach to uncovering such modules is to use graph theory for motif analysis on detailed mass-  
 591 action models, but this approach loses key aspects of system dynamics (Alon 2007). With the  
 592 HillTau formalism and our procedures for model reduction, we are able to generate highly reduced  
 593 reaction graphs that nevertheless support rather accurate dynamics. The formalism encourages  
 594 models that can be readily mapped to biology. Thus HillTau supports a data-driven approach to  
 595 arrive at functional modules.

596 While functional modules are good for analysis, we note that biology does not necessarily partition  
 597 signaling networks into neat modules (Upinder S Bhalla 2003). Indeed, cross-talk between  
 598 pathways is common. HillTau supports explicit cross-talk interactions, but does not introduce

599 implicit interactions. In this regard it differs from mass-action reaction systems, in which  
 600 mechanisms such as back-reactions or enzyme sequestration may introduce subtle effects, such as  
 601 implicit feedback. For example, one can achieve bistability through multistage  
 602 phosphorylation/dephosphorylation cascades (Markevich, Hoek, and Kholodenko 2004). To  
 603 represent such effects in HillTau one would have to introduce explicit feedback steps between  
 604 reactions, such as in the bistability example in Figure 2. Similarly, interesting behavior emerging  
 605 from chemical saturation, such as zero-order ultrasensitivity (Goldbeter and Koshland 1981) would  
 606 require the use of the explicit math expressions supported by HillTau.

607 Protein-protein interaction networks are a commonly derived form of abstract networks. These can  
 608 be purely topological, or may also include reaction dynamics (Nyman et al. 2020). Can these be  
 609 parsed into HillTau networks? To first order, protein interaction networks lack the distinction that  
 610 HillTau ‘reactions’ make between inputs, activators and modulators. Additional information is  
 611 needed to disambiguate these. Data from sources such as pathway maps, protein domain properties,  
 612 or Gene Ontology relationships are required to resolve HillTau topologies for a given protein-  
 613 protein network (Sorokina, Sorokin, and Armstrong 2011).

614 Next, can the rates be assigned? In networks that include dynamics (e.g., (Nyman et al. 2020)) this  
 615 is relatively straightforward to accomplish. In Figure 4 and 5 we illustrate how experimental data,  
 616 or simulated dynamics of an existing model can be used to parameterize a HillTau model. The same  
 617 approach could utilize the original timing constraints that went into the Nyman model (Nyman et al.  
 618 2020). Alternatively, a program similar to MASH could explore dynamics of the reference (protein-  
 619 protein network) model, and use the output to search for parameters of the corresponding HillTau  
 620 model.

621

622 Thus HillTau promotes abstraction through model reduction. The abstracted models expose all  
 623 interactions explicitly.

624

## 625 **Scaffolds for model fitting**

626 Third, HillTau is a useful intermediate step, or *scaffold*, for model fitting of large mass-action  
 627 models. Direct model-fitting is difficult in at least two ways: there are typically far fewer  
 628 experiments than parameters, and it is computationally costly to run a large ODE model many times  
 629 for carrying out an optimization approach to model fitting. We propose that the HillTau form may  
 630 provide a useful bridge on both these counts. As we have illustrated in Figures 2, 3 and 5, HillTau  
 631 models lend themselves to fitting to experiments because they have few parameters and they run  
 632 quickly. Several advantages accrue from an initial pass to make and fit a HillTau model. 1. In  
 633 building and optimizing a HillTau model, the optimization dataset will be use-tested, and gaps  
 634 identified. 2. The essential pathway structure of the model will be defined by the HillTau model,  
 635 and key interactions identified. The mass-action model must, at minimum, incorporate these  
 636 interactions. 3. The parameters of the HillTau model set bounds for those of the detailed reaction  
 637 sets. For example, the time-course of any individual mass-action reaction step must be faster than  
 638 the HillTau reaction in which it is embedded.

639

## 640 **Efficient approximations to complex signaling**

641 Finally, HillTau models are useful because they are *efficient*. One of the key use-cases envisioned  
 642 for HillTau was to model complex cellular signaling, with synaptic signaling as an exemplar.  
 643 Several of the examples in the current paper are in this domain, specifically the BCM curve (Fig  
 644 3A-E, the coupled BCM curve with bistables (Fig 3F,G), and a synaptic protein synthesis pathway  
 645 (Figure 5). While even these large ODE signaling models run somewhat faster than wall-clock time  
 646 (Figure 6), there are at least two cases where far greater efficiency is desirable. First, as mentioned  
 647 above, model parameter optimization requires a large number of evaluations of complete

648 simulations (100s to 1000s in our experience). To perform a single evaluation, these synaptic  
649 simulations may have to run for many thousands of seconds of simulation time to compare with  
650 typical plasticity experiments (Ajay and Bhalla 2004). Further, one typically optimizes a pathway to  
651 fit numerous experiments, all of which must be simulated for each evaluation. Together, this is  
652 computationally expensive. In our HillTau optimizations using MASH, the total simulation time for  
653 large numbers of pathway simulations was typically even smaller than the time spent by the  
654 minimizer code itself.

655 A second use case for highly efficient signaling models is in synaptic signaling. A single neuron  
656 may have over 10,000 spines, and there may be many such neurons in a network. If each synapse is  
657 to implement a complex biochemical pathway the computational costs may be formidable. Network  
658 plasticity models (Higgins, Graupner, and Brunel 2014), and cellular sequence selectivity models  
659 (Upinder S Bhalla 2017) are examples of this scale of model. Indeed, Higgins et al. (Higgins,  
660 Graupner, and Brunel 2014) have used an efficient event-driven calculation of synaptic weights  
661 with a similar exponential decay calculation as in HillTau. HillTau signaling provides a way to  
662 implement biologically detailed synaptic dynamics in every synapse, even in large networks.

663 In summary, the HillTau form and its supporting toolkits for running and optimizing models  
664 provide a compact, efficient way to perform data-driven abstraction of complex signaling models.

## 665 **Methods**

### 666 **HillTau formulation**

667 The HillTau formulation is an event-driven variant of a Hill equation with modifiers. It is specified  
 668 and evaluated in two stages: the steady-state value, and an exponential time-course of approach to  
 669 steady-state. As detailed below, reactions in a HillTau model are evaluated in successive layers such  
 670 that the next estimate for steady-state value of a given layer depends only on boundary conditions  
 671 and on outputs from preceding layers. In the equations below we expand out the equations for a  
 672 range of use-cases. In equations 1.x we specify the steady-state values for each use case. In  
 673 equations 2.x we define the approach to steady state. In equations 3.x we combine equations 1 and 2  
 674 to summarize the evaluations done in HillTau. In equations 4.x we provide interpretations of the  
 675 HillTau equations as rate terms which can be evaluated by regular ODE solvers and form the basis  
 676 for the SBML export of HillTau model systems. However, the definitive form of HillTau is event-  
 677 driven and the rate-term form should be regarded as a convenient but approximate mapping to  
 678 conventional mass-action solvers. In equations 5.x we provide a motivation for the form of HillTau  
 679 as an approximation to complex signaling chemistry.

### 680 **HillTau steady-state.**

681 The HillTau formulation stipulates that the steady-state level  $Y_{\infty}$  of each signaling step (which may  
 682 involve multiple chemical steps) is approximated by a Hill function

683

$$684 \quad Y_{\infty}/Y_{\text{input}} = \Theta = L^n/(KA^n + L^n) \quad \text{Eq 1.1}$$

685

686 Here  $Y_{\text{input}}$  is the input concentration to this signaling step, where  $Y_{\text{input}}$  is either a molecule with a  
 687 predefined concentration (i.e, a boundary condition) or coming from an upstream reaction.

Likewise, the reactant  $L$  can either be predefined or come from an upstream reaction.  $KA$  is the association constant of  $L$  with  $Y$ .

We elaborate this slightly to accommodate an optional gain term:

$$Y_{\infty} = Y_{\text{gain}} \cdot Y_{\text{input}} L^n / (KA^n + L^n) \quad \text{Eq 1.2}$$

We utilize a slightly modified form to permit the Ligand  $L$  to act in an inhibitory manner:

$$Y_{\infty} = Y_{\text{gain}} \cdot Y_{\text{input}} (1 - L^n / (KA^n + L^n)) \quad \text{Eq 1.3}$$

In cases where there are modifiers, we include a further term based on the analysis of Hofmeyer and Cornish-Bowden (1997):

$$Y_{\infty} = Y_{\text{gain}} \cdot Y_{\text{input}} \cdot L^n / (KA^n (1 + M/K_{\text{mod}})^h) / (1 + A_{\text{mod}} (M/K_{\text{mod}})^h + L^n) \quad \text{Eq 1.4}$$

Here  $M$  is the concentration of the modifier,  $K_{\text{mod}}$  is the half-effect value,  $A_{\text{mod}}$  is the modifier action, and  $h$  is the order of the modifier. The modifier acts in an inhibitory manner when  $A_{\text{mod}} < 1$ , and as an activator when  $A_{\text{mod}} > 1$ . When  $A_{\text{mod}} == 1$ , clearly, the modifier has no effect.

Similarly we define the action of the modifier on an inhibitory reaction:

$$Y_{\infty} = Y_{\text{gain}} Y_{\text{input}} (1 - L^n / (KA^n (1 + M/K_{\text{mod}})^h) / (1 + A_{\text{mod}} (M/K_{\text{mod}})^h + L^n)) \quad \text{Eq 1.5}$$

We use a different equation to define steady-state behavior of a system where a single substrate molecule  $Y_{\text{input}}$  is converted into a product  $Y$ :

$$Y_{\infty} = Y_{\text{input}}^n / KA \quad \text{Eq 1.6}$$

For the rare cases where a non-chemical formulation is needed to describe the system, we provide

713 an alternative algebraic expression for  $Y_{\infty}$ :

714

$$715 \quad Y_{\infty} = f(Y_1, Y_2, \dots) \quad \text{Eq 1.7}$$

716

717 where  $f$  is an arbitrary algebraic function and  $Y_1, Y_2, \dots$  are concentrations of other molecules. The  
718 use of this algebraic form is discouraged as it weakens the mapping of the model to the underlying  
719 chemistry. This form does not admit of modifiers.

720 Note that these equations are entirely feed-forward: the concentrations of molecules  $L$ ,  $M$ , and  
721  $Y_{\text{input}}$  are not affected by their participating in any downstream reactions.

## 722 **HillTau time course**

723 Equations 1 define the steady state estimate for molecule  $Y$ , given a set of molecule concentrations  
724 in the preceding layer. We then assume that the approach of the system to steady-state is governed  
725 by a simple exponential with characteristic time  $\tau$  (Figure 1A):

726

$$727 \quad (Y(t+\Delta t) - Y(t)) / (Y_{\infty} - Y(t)) = 1 - \exp(-\Delta t / \tau) \quad \text{Eq 2}$$

728

729 where  $Y(t)$  is the value of  $Y$  at time  $t$ . For a simple binding reaction, the time course  $\tau$  is an  
730 experimental observable, and is approximated by  $\tau \sim 1/(k_f + k_b)$  where  $k_f$  and  $k_b$  are the forward and  
731 backward rates for the first-order Hill binding reaction (Figure 1, Supplementary Figure S1.1).

732 As a slight extension to this, we permit an optional separate time course  $\tau_2$  when  $Y$  is falling:

733

$$734 \quad \text{If } Y_{\infty} > Y(t) \quad (Y(t+\Delta t) - Y(t)) / (Y_{\infty} - Y(t)) = 1 - \exp(-\Delta t / \tau) \quad \text{Eq 2.1}$$

$$735 \quad \text{If } Y_{\infty} < Y(t) \quad (Y(t+\Delta t) - Y(t)) / (Y_{\infty} - Y(t)) = 1 - \exp(-\Delta t / \tau_2) \quad \text{Eq 2.2}$$

736

737 The occurrence of different time-courses for buildup and decay is quite common. It happens in a



738 simple binding reaction (Supplementary Figure S1.1, panels A, C, E). It also occurs when there are  
739 different chemical steps, such as enzymes with different rates, mediating competing processes for  
740 buildup and decay.

741

## 742 **HillTau composite form**

743 Putting Eq 1 and Eq 2 together, we have the following closed-form expression for the value of Y at  
744 time  $t + \Delta t$ :

745

$$746 \quad Y(t+\Delta t) = Y(t) + (Y_{\infty} - (Y(t) - Y_{\text{baseline}})) (1 - \exp(-\Delta t / \tau)) \quad \text{Eq 3}$$

747 The term  $Y_{\text{baseline}}$  is an optional (positive) baseline level of molecule Y.  $\Delta t$  is the timestep. Note that  
748 this is a closed form:  $\Delta t$  can be as large as the end of the simulation.

749

750 In the limit of large  $\Delta t$ , we have,

751

$$752 \quad Y_{(t=\infty)} = Y_{\infty} + Y_{\text{baseline}} \quad \text{Eq 3.1}$$

753 The initial conditions for molecule Y are either specified in the model definition, or as a fallback we  
754 estimate the steady-state concentration as in Eq 3.1.

755

## 756 **Rate interpretation of HillTau**

757 Formally, HillTau can be seen as an approximation to the following rate equations:

758

$$759 \quad Y'(t) = (Y_{\infty} - Y(t)) / \tau \quad \text{Eq 4}$$

760 In cases where we have a separate  $\tau_2$ , and  $Y_{\infty} < Y(t)$ :

$$761 \quad Y'(t) = (Y_{\infty} - Y(t)) / \tau_2 \quad \text{Eq 4b}$$

762 SBML, and most ODE solvers, will not readily handle this switch between  $\tau$  and  $\tau_2$ . For the

763 purposes of the equations below we just use  $\tau$ .

764 Expanding out  $Y_{\infty}$ , we have five variants of equation 4:

765 Basic activation reaction:

$$766 \quad Y'(t) = (Y_{\text{gain}} \cdot Y_{\text{input}} L^n / (KA^n + L^n) - Y(t)) / \tau \quad \text{Eq 4.1}$$

767 Basic inhibition reaction:

$$768 \quad Y'(t) = (Y_{\text{gain}} \cdot Y_{\text{input}} (1 - L^n / (KA^n + L^n)) - Y(t)) / \tau \quad \text{Eq 4.2}$$

769 Activation reaction with modifier:

$$770 \quad Y'(t) = (Y_{\text{gain}} \cdot Y_{\text{input}} \cdot L^n / (KA^n (1 + (M/K_{\text{mod}})^h) / (1 + A_{\text{mod}} (M/K_{\text{mod}})^h) + L^n) - Y(t)) / \tau \quad \text{Eq 4.3}$$

771 Inhibition reaction with modifier:

$$772 \quad Y'(t) = (Y_{\text{gain}} \cdot Y_{\text{input}} \cdot (1 - L^n / (KA^n (1 + (M/K_{\text{mod}})^h) / (1 + A_{\text{mod}} (M/K_{\text{mod}})^h) + L^n)) - Y(t)) / \tau \quad \text{Eq 4.4}$$

773 Conversion reaction:

$$774 \quad Y'(t) = ((Y_{\text{input}}^n / KA) - Y(t)) / \tau \quad \text{Eq 4.5}$$

775 Although the HillTau calculations can be done using equations 4.x with a regular ODE solver, the  
 776 HillTau definition envisions event-driven calculations. Further, the complete HillTau form uses  $\tau_2$   
 777 extensively, which is not handled by the above equations. In principle, the optimization for the  
 778 HillTau model could just use  $\tau$  throughout, in which case the reduced HillTau model could be  
 779 rendered in mass-action form with a reasonable degree of accuracy (Supplementary Figure 5.4A).

780

781 Here we summarize the parameters for HillTau. All but the first apply to Reactions.

| Parameter | Units                                                 | Meaning                                                                 | Default | Required? |
|-----------|-------------------------------------------------------|-------------------------------------------------------------------------|---------|-----------|
| ConcInit  | Concentration<br><br>(can be any of M,<br>mM, uM, nM) | Initial<br>concentration.<br><br>Only applies to<br>species definitions | 0       | No        |
| KA        | Concentration                                         | Association                                                             | N/A     | Yes       |

|          |                |                                                                                      |        |                                         |
|----------|----------------|--------------------------------------------------------------------------------------|--------|-----------------------------------------|
|          |                | constant                                                                             |        |                                         |
| $\tau$   | Time (seconds) | Time course for relaxation to steady state                                           | N/A    | Yes                                     |
| $\tau_2$ | Time (seconds) | Time course of relaxation if output is falling.                                      | $\tau$ | No                                      |
| Gain     | None           | Scaling factor for reaction output.<br><br>Used to indicate enzymatic amplification. | 1      | No                                      |
| Baseline | Concentration  | Baseline value of reaction output                                                    | 0      | No                                      |
| Kmod     | Concentration  | Half-saturation concentration for modifier                                           | N/A    | Only if modifier molecule is specified. |
| Amod     | None           | Activation term for modifier                                                         | 4      | No                                      |
| Nmod     | None           | Order of modifier action                                                             | 1      | No                                      |

782

783 Table 1: Parameters used to define a HillTau model. Concentration units can be any of M, mM, uM,  
784 and nM, and are specified in the Json file. The default concentration units are mM.

785

786 Simple HillTau models only need species concentrations, and the KA and  $\tau$  terms for the reactions.

787 The optional terms greatly facilitate the design goals of compactly specifying diverse signaling

788 reactions.

789

790

## 791 **Computing time-evolution and steady-states.**

792 To build complex reaction systems, we permit cascading of reactions so that any molecule can be a  
 793 substrate or equation term in any other reaction. To reiterate, this is a purely feed-forward  
 794 formulation, so substrates are not affected by any of their downstream targets. We obtain a  
 795 dependency tree so that on each timestep the updates are carried out in an order which ensures that  
 796 inputs ripple in order through the cascade of reactions. This may lead to inaccurate estimation of  
 797 transient responses if the updates are carried out at greater intervals (timestep  $\Delta t$ ) than the time-  
 798 course ( $\tau$ ) of the fastest reaction in the model (Supplementary Figure S7). To address this, HillTau  
 799 assigns an internal timestep  $\Delta t$  which is smaller than the smallest  $\tau$  in the model. Since one  
 800 normally performs time-series sampling of reactions at a time finer than the fastest reaction, this  
 801 restriction usually has little impact on run-time. Further, multi-step systems may include feedback.  
 802 In such cases the program has to explicitly break the dependency chain. HillTau identifies  
 803 dependency cycles, picks a reaction based on definition order, and assigns it the next open level in  
 804 the dependency tree.

805 A distinct case arises when the HillTau system is used to compute steady state values (e.g., in a  
 806 dose-response curve). These could ideally be solved by taking an infinitely long time-step. Given  
 807 the possible presence of feedback, we instead take a long settling time and subdivide it into 10 equal  
 808 steps so as to allow feedback reactions to also settle.

## 809 **Motivation for the HillTau formalism**

810 The initial motivation for the HillTau form was the observation that many stimulus-response curves  
 811 in signaling have a saturating, Hill-like concentration dependence on input strength even if there are  
 812 multiple intermediate steps (U S Bhalla and Iyengar 1999; Jain and Bhalla 2009). Further, many

stimulus-response time-courses are visually similar to exponential time-courses. This suggested that a combination of these two properties might be a good approximation even to multi-step signaling cascades.

In order to mathematically support this idea, we considered two of the common motifs in signaling: enzyme-activation of molecules such as phospho-proteins, with a balancing deactivation reaction; and binding of activators to a reagent. Below, we show that the HillTau form achieves a reasonable approximation both to the amplitude and time-course of the response.

First, we considered outcomes of an enzymatic cascade with back reactions. We approximate the rate of production using a Michaelis-Menten- form:

$$dP/dt = ES.kcat/(K_m + S) \quad \text{Eq 5.1}$$

This is balanced by a first-order back reaction:

$$dP/dt = -kr.P \quad \text{Eq 5.2}$$

Then the steady-state at  $dP/dt = 0$  is obtained by combining these:

$$P_1 = E.S_1.kcat_1/( (K_{m_1} + S_1) * kr_1 ) \quad \text{Eq 5.3}$$

This is of the same form as Equation 1, showing that a single enzymatic stage in the cascade can be approximated by HillTau. Here we add a subscript 1 to indicate that it is the first reaction in the cascade. Now we stipulate that  $P_1$  is the catalyst for the next step, substituting for enzyme  $E_2$ . This stage results in the formation of product  $P_2$ :

$$P_2 = (E.S_1.kcat_1/( (K_{m_1} + S_1) * kr_1 )) . S_2.kcat_2/( (K_{m_2} + S_2) * kr_2 ) \quad \text{Eq 5.4}$$

And so on for multiple steps. Now, suppose that we only have 2 variable inputs to this pathway: the first stage input  $E$  and one of the substrates. All other substrates are held fixed. This is a reasonable assumption for HillTau, because any further variable inputs should be treated explicitly either as modulators or as separate reaction steps. Then, all the  $(K_{m_n} + S_n)$  terms are constant except the one variable substrate  $S_v$ . By combining all the constant terms into  $K_{\text{cascade}}$ , we end up with:

$$P_n = E.S_v.K_{\text{cascade}}/(K_{m_v} + S_v) \quad \text{Eq 5.5}$$

838 This is equivalent to the Hill equation form at the basis of HillTau (See Eq 1.2). We treat inhibition  
839 using the same analysis, except resulting in depletion of a substrate (Eq 1.3).

840 For the time-course, we assume that one of the reactions is rate-limiting. For this step, the rate of  
841 formation of product is given by:

$$842 \quad dP/dt = ES.kcat/(K_m + S) - k_r.P \quad \text{Eq 5.6}$$

843 This yields an exponential settling curve with a final value  $P_\infty$ , as shown from Eq. 5.3. The time-  
844 course is given by:

$$845 \quad P(t) = P_\infty - (P_\infty - P_0) \exp(-t/\tau) \quad \text{Eq 5.7}$$

846 where

847  $\tau = 1/k_r$  and  $P_0$  is the initial value of  $P$ .

848 Note that Eq 5.7 can be rearranged to give Eq 3.

849 Overall, this approximation yields a consolidated HillTau ‘reaction’ in which we have one stimulus  
850 ( $E$ , mapping to the activator  $L$  in Eq. 1), one reactant ( $S_v$  mapping to the reagent  $Y_{\text{input}}$  in Eq.1), to  
851 represent a cascade of enzymatic steps with back reactions.

852 Next, we consider binding reactions in the pathway. These give the same steady-state Hill Equation  
853 form, by definition. From Equation 1.1, setting  $n = 1$ , and considering the first reaction generating  
854  $Y_1$ :

$$855 \quad Y_1 = L_1.R_1/(L_1 + K_{A1}) = R_1/(1 + K_{A1}/L_1) \quad \text{Eq 5.8}$$

856 A cascade of similar binding reactions, where  $Y_1$  feeds into reaction 2, can also be reduced into the  
857 same form:

$$858 \quad Y_2 = R_2/(1 + K_{A2}/Y_1) = R_2/(1 + K_{A2}*(1 + K_{A1}/L_1)/R_1) \\ 859 \quad = R_1R_2/(R_1 + K_{A2} + K_{A1}K_{A2}/L_1) = R_x/(1 + K_{Ax}/L_1) \quad \text{Eq 5.9}$$

860 where  $R_x = R_1R_2/(R_1 + K_{A2})$  and  $K_{Ax} = K_{A1}.K_{A2}/(R_1 + K_{A2})$

861 Here Eq 5.9 has the same form as Eq1.1 and Eq 5.8.

862 Using a similar approach, any number of cascading binding reactions will end up fitting the same

Hill form. Further, from Eq. 5.5 we see that the enzyme/back-reaction steps have a similar Hill-like form. Thus they too can be folded into this cascade.

What is the time-course of this cascaded reaction? As before, we assume that the cascade has one rate-limiting step  $i$ . A standard analysis shows that this too has an exponential time-course.

$$dY_i/dt = K_{f_i} \cdot L_i \cdot R_i - K_{b_i} \cdot Y_i \quad \text{Eq 5.10}$$

which yields the same exponential settling time-course as equation 5.7:

$$Y(t) = Y_{\text{inf}} - (Y_{\text{inf}} - Y_0) \exp(-t/\tau) \quad \text{Eq 5.11}$$

where  $\tau = 1/(L \cdot K_f + K_b)$  and  $Y_0$  is the initial value of  $Y$ .

It is important to note that this value of  $\tau$  has a dependence on a variable,  $L$ , and hence the use of a constant value of  $\tau$  is approximate. This is partially mitigated by utilizing different values of  $\tau$  for rising and falling phases of the signal  $Y$ . During the rising phase,  $L$  will have a different (typically larger) mean value than during the falling phase. The use of  $\tau$  for rising and  $\tau_2$  for falling phases of the response reflects this.

Thus the steady-state terms for cascading binding and enzymatic reactions can be consolidated into a single HillTau ‘reaction’ step of the Hill form, and the time-course can be approximated by an exponential when there is one rate-limiting step.

## Model definition and reference implementation

HillTau reaction systems are set up in a simple JSON format (Figure 1C), for which we have provided a schema. We have implemented a small reference driver program in Python (hillTau.py) that loads the model, runs it with optional stimuli, and plots or saves the output. The hillTau.py file also provides a set of library functions for use in larger programs. An equivalent implementation in C++ using PyBind11 for identical Python bindings is also provided. The source files, schema file, examples and documentation are all available on GitHub (<https://github.com/BhallaLab/HillTau>).

Three additional utilities are also provided, as described below: for model illustration, model

888 abstraction, and model conversion to SBML. Python scripts for generating the figures in this paper  
889 (except figure 4, which is a schematic only) are also provided in supplementary material and on the  
890 GitHub site. Benchmarking was done using the program *fig6.py*, which calls MOOSE and HillTau  
891 through their Python interfaces, and calls COPASI through the PyCoTools Python interface (Welsh  
892 et al. 2018). The output values of multiple benchmarking runs were averaged and used for  
893 generating the graphs in *fig6\_plotting.py*. All HillTau and supporting code is licensed under GPL  
894 version 3 or later.

## 895 **Model illustration**

896 We developed a utility *htgraph.py*, which generates a reaction diagram for HillTau models specified  
897 in the .json format. This diagram gives a complete specification of the model topology, in that one  
898 can rebuild the structure of the HillTau model by inspection of the reaction diagram, though of  
899 course the parameters are not provided in the diagram. *htgraph.py* uses the *dot* module of the open-  
900 source package *graphviz* (Gansner and North 2000) to generate the network graphs.

## 901 **Model reduction and abstraction: MASH**

902 We provide a utility for performing Model Abstraction from SBML to HillTau: MASH. Briefly,  
903 MASH runs the original SBML model with a reference stimulus to explore the key dimensions of  
904 its input-output mappings. Typical reference stimuli (built into MASH) include dose-response  
905 curves and pulsatile time-series stimuli. MASH then uses standard minimization routines  
906 (scipy.optimize library, method “L-BFGS-B”, (Zhu et al. 1997)) to tweak the HillTau model  
907 parameters to improve its fit to the original model.  
908 MASH is implemented as a Python script *mash.py* which uses an ODE model (SBML) as a  
909 reference to which it fits a HillTau model. The user provides an initial HillTau model and specifies  
910 a series of stimuli to deliver. As part of this the user also defines which are the input molecules, and  
911 which are the readouts, and the ODE and HillTau models. MASH generates a topologically



identical HillTau model to the original, with parameters optimized to fit. It also reports initial and final scores, expressed as normalized RMS difference between reference model and HillTau. As per Figure 4, the user may introduce additional intermediate steps in the pathway in order to achieve the target model fit. The user specifies a set of stimuli (typically a combination of dose-response and time-series calculations) that explore the model response space. MASH generates a reference response to these stimuli using an ODE solver (MOOSE). The function evaluation for the minimization is carried out by running the HillTau model with the same stimulus, and comparing the HillTau output point-by-point with the reference. The normalized RMS difference over all points is returned as the score. A score of below 0.05 means that on average the original response differs from the HillTau response by less than 5%. MASH uses the `scipy.optimize` library to tweak the HillTau model parameters to improve the fit, as measured by this RMS score. MASH documentation and examples are provided on the HillTau website. MASH was used to fit the HillTau models for figures 2, 3 and 5, and the scores are reported. Supplementary figures and data specify how these fits were done.

## Model conversion to SBML

The utility *ht2sbml.py* performs a conversion of HillTau models defined in the reference JSON format, into equivalent ODE models defined in SBML. It uses *simplesbml* (<https://github.com/sys-bio/simplesbml>) for generating the SBML. This uses the forms defined in equations 4.x in Methods. The conversion is approximate on two counts, first, HillTau is an event-driven, not continuous method, and second, HillTau may use different time-courses for rising and falling phases as a reaction proceeds, whereas the ODE form uses only a single time-course. If the HillTau model is generated (for example, after model reduction) such that each reaction only utilizes tau and not tau<sup>2</sup>, then the approximation is very good. In Supplementary Figure S5.4, we performed *ht2sbml.py* conversion of 3 HillTau models to SBML and then compared the HillTau output with COPASI

937 calculation of the converted model, under 5 conditions. We obtained an excellent fit (<1%  
 938 normalized RMS) for an oscillatory model that did not use tau2. The feedback-inhibition model  
 939 used in Figure 2, which does use tau2, gave a mediocre fit of 29%. The full protein synthesis model  
 940 was tested under 3 conditions: protein response to BDNF, S6K response to BDNF, and CaMKIII  
 941 response to Ca. These gave fits of 30%, 26% and 1.7% respectively, though the qualitative response  
 942 was similar in all cases. Thus the *ht2sbml.py* conversion works for all HillTau models, but the  
 943 conversion may be approximate for models which have very different tau and tau2 parameters in  
 944 their reactions.

945

## 946 **Acknowledgments**

947 USB received support from NCBS-TIFR, which is supported by the Department of Atomic Energy,  
948 Government of India, under project identification No. RTI 4006. USB also received grant support  
949 from Department of Science and Technology, project No. DST/INT/SWD/VR/P-09/2016.

950 Nisha Viswan provided useful feedback from use-testing HillTau. G.V. HarshaRani did much of the  
951 coding for htgraph.py and configured the HillTau repository for installation using pip.

952

953

## 954 References

- Ajay, Sriram M, and Upinder S Bhalla. 2004. "A Role for ERKII in Synaptic Pattern Selectivity on the Time-Scale of Minutes." *The European Journal of Neuroscience* 20 (10): 2671–80. <https://doi.org/10.1111/j.1460-9568.2004.03725.x>.
- Alon, Uri. 2007. "Network Motifs: Theory and Experimental Approaches." *Nature Reviews. Genetics* 8 (6): 450–61. <https://doi.org/10.1038/nrg2102>.
- Andrews, Steven S, Nathan J Addy, Roger Brent, and Adam P Arkin. 2010. "Detailed Simulations of Cell Biology with Smoldyn 2.1." *PLoS Computational Biology* 6 (3): e1000705. <https://doi.org/10.1371/journal.pcbi.1000705>.
- Apri, Mochamad, Maarten de Gee, Simon van Mourik, and Jaap Molenaar. 2014. "Identifying Optimal Models to Represent Biochemical Systems." *PLOS ONE* 9 (1): e83664. <https://doi.org/10.1371/journal.pone.0083664>.
- Barak, Omri, and Misha Tsodyks. 2006. "Recognition by Variance: Learning Rules for Spatiotemporal Patterns." *Neural Computation* 18 (10): 2343–58. <https://doi.org/10.1162/neco.2006.18.10.2343>.
- Bayés, Alex, Louie N. van de Lagemat, Mark O. Collins, Mike D. R. Croning, Ian R. Whittle, Jyoti S. Choudhary, and Seth G. N. Grant. 2011. "Characterization of the Proteome, Diseases and Evolution of the Human Postsynaptic Density." *Nature Neuroscience* 14 (1): 19–21. <https://doi.org/10.1038/nn.2719>.
- Bhalla, U S, and R Iyengar. 1999. "Emergent Properties of Networks of Biological Signaling Pathways." *Science (New York, N.Y.)* 283 (5400): 381–87.
- . 2001. "Functional Modules in Biological Signalling Networks." *Novartis Foundation Symposium* 239: 4–13; discussion 13-15, 45–51.
- Bhalla, Upinder S. 2002. "The Chemical Organization of Signaling Interactions." *Bioinformatics* 18 (6): 855–63.
- Bhalla, Upinder S. 2003. "Understanding Complex Signaling Networks through Models and Metaphors." *Progress in Biophysics and Molecular Biology* 81 (1): 45–65.
- Bhalla, Upinder S. 2014. "Multiscale Modeling and Synaptic Plasticity." *Progress in Molecular Biology and Translational Science* 123: 351–86. <https://doi.org/10.1016/B978-0-12-397897-4.00012-7>.
- Bhalla, Upinder S. 2014. "Molecular Computation in Neurons: A Modeling Perspective." *Current Opinion in Neurobiology*, Theoretical and computational neuroscience, 25 (April): 31–37. <https://doi.org/10.1016/j.conb.2013.11.006>.
- . 2017. "Synaptic Input Sequence Discrimination on Behavioral Timescales Mediated by Reaction-Diffusion Chemistry in Dendrites." *ELife* 6 (April). <https://doi.org/10.7554/eLife.25827>.
- Bienenstock, E L, L N Cooper, and P W Munro. 1982. "Theory for the Development of Neuron Selectivity: Orientation Specificity and Binocular Interaction in Visual Cortex." *The Journal of Neuroscience* 2 (1): 32–48.
- Bray, D. 1995. "Protein Molecules as Computational Elements in Living Cells." *Nature* 376 (6538): 307–12. <https://doi.org/10.1038/376307a0>.
- Clarke, Bruce L. 1981. "Complete Set of Steady States for the General Stoichiometric Dynamical System." *Journal of Chemical Physics* 75 (10): 4970–79.
- Dan, Yang, and Mu-Ming Poo. 2004. "Spike Timing-Dependent Plasticity of Neural Circuits." *Neuron* 44 (1): 23–30.

- Danø, Sune, Mads F. Madsen, Henning Schmidt, and Gunnar Cedersund. 2006. "Reduction of a Biochemical Model with Preservation of Its Basic Dynamic Properties." *The FEBS Journal* 273 (21): 4862–77. <https://doi.org/10.1111/j.1742-4658.2006.05485.x>.
- Deuflhard, P., and J. Herroth. 1996. "Dynamic Dimension Reduction in ODE Models." In *Scientific Computing in Chemical Engineering*, edited by Frerich Keil, Wolfgang Mackens, Heinrich Voß, and Joachim Werther, 29–43. Berlin, Heidelberg: Springer. [https://doi.org/10.1007/978-3-642-80149-5\\_4](https://doi.org/10.1007/978-3-642-80149-5_4).
- Dormanns, K., R. G. Brown, and T. David. 2016. "The Role of Nitric Oxide in Neurovascular Coupling." *Journal of Theoretical Biology* 394 (April): 1–17. <https://doi.org/10.1016/j.jtbi.2016.01.009>.
- Frey, U, and R G Morris. 1997. "Synaptic Tagging and Long-Term Potentiation." *Nature* 385 (6616): 533–36. <https://doi.org/10.1038/385533a0>.
- Gansner, Emden R., and Stephen C. North. 2000. "An Open Graph Visualization System and Its Applications to Software Engineering." *Software - Practice and Experience* 30 (11): 1203–33.
- Goldbeter, A, and D E Koshland. 1981. "An Amplified Sensitivity Arising from Covalent Modification in Biological Systems." *Proceedings of the National Academy of Sciences of the United States of America* 78 (11): 6840–44.
- Hayer, Arnold, and Upinder S Bhalla. 2005. "Molecular Switches at the Synapse Emerge from Receptor and Kinase Traffic." *PLoS Computational Biology* 1 (2): 137–54. <https://doi.org/10.1371/journal.pcbi.0010020>.
- Higgins, David, Michael Graupner, and Nicolas Brunel. 2014. "Memory Maintenance in Synapses with Calcium-Based Plasticity in the Presence of Background Activity." *PLoS Computational Biology* 10 (10): e1003834. <https://doi.org/10.1371/journal.pcbi.1003834>.
- Hindmarsh, Alan C., Peter N. Brown, Keith E. Grant, Steven L. Lee, Radu Serban, Dan E. Shumaker, and Carol S. Woodward. 2005. "SUNDIALS: Suite of Nonlinear and Differential/Algebraic Equation Solvers." *ACM Transactions on Mathematical Software* 31 (3): 363–96. <https://doi.org/10.1145/1089014.1089020>.
- Hofmeyr, J. H., and A. Cornish-Bowden. 1997. "The Reversible Hill Equation: How to Incorporate Cooperative Enzymes into Metabolic Models." *Computer Applications in the Biosciences: CABIOS* 13 (4): 377–85. <https://doi.org/10.1093/bioinformatics/13.4.377>.
- Hoops, Stefan, Sven Sahle, Ralph Gauges, Christine Lee, Jürgen Pahle, Natalia Simus, Mudita Singhal, Liang Xu, Pedro Mendes, and Ursula Kummer. 2006. "COPASI--a Complex PATHway Simulator." *Bioinformatics (Oxford, England)* 22 (24): 3067–74. <https://doi.org/10.1093/bioinformatics/btl485>.
- Hudmon, Andy, Eric Lebel, Hugo Roy, Attila Sik, Howard Schulman, M Neal Waxham, and Paul De Koninck. 2005. "A Mechanism for Ca<sup>2+</sup>/Calmodulin-Dependent Protein Kinase II Clustering at Synaptic and Nonsynaptic Sites Based on Self-Association." *The Journal of Neuroscience: The Official Journal of the Society for Neuroscience* 25 (30): 6971–83. <https://doi.org/10.1523/JNEUROSCI.4698-04.2005>.
- Jain, Pragati, and Upinder S Bhalla. 2009. "Signaling Logic of Activity-Triggered Dendritic Protein Synthesis: An MTOR Gate but Not a Feedback Switch." *PLoS Computational Biology* 5 (2): e1000287. <https://doi.org/10.1371/journal.pcbi.1000287>.
- Kholodenko, B. N. 2000. "Negative Feedback and Ultrasensitivity Can Bring about Oscillations in the Mitogen-Activated Protein Kinase Cascades." *European Journal of Biochemistry* 267 (6): 1583–88. <https://doi.org/10.1046/j.1432-1327.2000.01197.x>.
- Kim, BoHung, Sarah L Hawes, Fawad Gillani, Lane J Wallace, and Kim T Blackwell. 2013. "Signaling Pathways Involved in Striatal Synaptic Plasticity Are Sensitive to Temporal Pattern and Exhibit Spatial Specificity." *PLoS Computational Biology* 9 (3): e1002953. <https://doi.org/10.1371/journal.pcbi.1002953>.

- Lisman, J. 1989. “A Mechanism for the Hebb and the Anti-Hebb Processes Underlying Learning and Memory.” *Proceedings of the National Academy of Sciences of the United States of America* 86 (23): 9574–78.
- Lomnitz, Jason G., and Michael A. Savageau. 2016. “Design Space Toolbox V2: Automated Software Enabling a Novel Phenotype-Centric Modeling Strategy for Natural and Synthetic Biological Systems.” *Frontiers in Genetics* 7: 118.  
<https://doi.org/10.3389/fgene.2016.00118>.
- Markevich, Nick I, Jan B Hoek, and Boris N Kholodenko. 2004. “Signaling Switches and Bistability Arising from Multisite Phosphorylation in Protein Kinase Cascades.” *The Journal of Cell Biology* 164 (3): 353–59.
- Markram, Henry, Eilif Muller, Srikanth Ramaswamy, Michael W. Reimann, Marwan Abdellah, Carlos Aguado Sanchez, Anastasia Ailamaki, et al. 2015. “Reconstruction and Simulation of Neocortical Microcircuitry.” *Cell* 163 (2): 456–92.  
<https://doi.org/10.1016/j.cell.2015.09.029>.
- Maurya, M R, S J Bornheimer, V Venkatasubramanian, and S Subramaniam. 2005. “Reduced-Order Modelling of Biochemical Networks: Application to the GTPase-Cycle Signalling Module.” *IEE Proceedings. Systems Biology* 152 (4): 229–42.
- Mayer, Jürgen, Khaled Khairy, and Jonathon Howard. 2010. “Drawing an Elephant with Four Complex Parameters.” *American Journal of Physics* 78 (6): 648–49.  
<https://doi.org/10.1119/1.3254017>.
- Novák, Béla, and John J Tyson. 2004. “A Model for Restriction Point Control of the Mammalian Cell Cycle.” *Journal of Theoretical Biology* 230 (4): 563–79.
- Nyman, Elin, Richard R. Stein, Xiaohong Jing, Weiqing Wang, Benjamin Marks, Ioannis K. Zervantonakis, Anil Korkut, Nicholas P. Gauthier, and Chris Sander. 2020. “Perturbation Biology Links Temporal Protein Changes to Drug Responses in a Melanoma Cell Line.” *PLOS Computational Biology* 16 (7): e1007909.  
<https://doi.org/10.1371/journal.pcbi.1007909>.
- Oliveira, Rodrigo F, Anna Terrin, Giulietta Di Benedetto, Robert C Cannon, Wonryull Koh, MyungSook Kim, Manuela Zaccolo, and Kim T Blackwell. 2010. “The Role of Type 4 Phosphodiesterases in Generating Microdomains of cAMP: Large Scale Stochastic Simulations.” *PloS One* 5 (7): e11725. <https://doi.org/10.1371/journal.pone.0011725>.
- Quaiser, Tom, Anna Dittrich, Fred Schaper, and Martin Mönnigmann. 2011. “A Simple Work Flow for Biologically Inspired Model Reduction - Application to Early JAK-STAT Signaling.” *BMC Systems Biology* 5 (1): 30. <https://doi.org/10.1186/1752-0509-5-30>.
- Radulescu, O., A. N. Gorban, A. Zinovyev, and V. Noel. 2012. “Reduction of Dynamical Biochemical Reactions Networks in Computational Biology.” *Frontiers in Genetics* 3: 131.  
<https://doi.org/10.3389/fgene.2012.00131>.
- Radulescu, Ovidiu, Alexander N. Gorban, Andrei Zinovyev, and Alain Liliénbaum. 2008. “Robust Simplifications of Multiscale Biochemical Networks.” *BMC Systems Biology* 2 (October): 86. <https://doi.org/10.1186/1752-0509-2-86>.
- Ray, Subhasis, and Upinder S Bhalla. 2008. “PyMOOSE: Interoperable Scripting in Python for MOOSE.” *Frontiers in Neuroinformatics* 2: 6. <https://doi.org/10.3389/neuro.11.006.2008>.
- Roelfsema, Pieter R., and Anthony Holtmaat. 2018. “Control of Synaptic Plasticity in Deep Cortical Networks.” *Nature Reviews. Neuroscience* 19 (3): 166–80.  
<https://doi.org/10.1038/nrn.2018.6>.
- Savageau, Michael A. 2001. “Design Principles for Elementary Gene Circuits: Elements, Methods, and Examples.” *Chaos* 11 (1): 142–59. <https://doi.org/10.1063/1.1349892>.
- Shouval, Harel Z, Mark F Bear, and Leon N Cooper. 2002. “A Unified Model of NMDA Receptor-Dependent Bidirectional Synaptic Plasticity.” *Proceedings of the National Academy of Sciences of the United States of America* 99 (16): 10831–36.



- <https://doi.org/10.1073/pnas.152343099>.
- Singh, Dilawar, and Upinder Singh Bhalla. 2018. "Subunit Exchange Enhances Information Retention by CaMKII in Dendritic Spines." *ELife* 7. <https://doi.org/10.7554/eLife.41412>.
- Smolen, Paul, Douglas A. Baxter, and John H. Byrne. 2012. "Molecular Constraints on Synaptic Tagging and Maintenance of Long-Term Potentiation: A Predictive Model." *PLoS Comput Biol* 8 (8): e1002620. <https://doi.org/10.1371/journal.pcbi.1002620>.
- Snowden, Thomas J., Piet H. van der Graaf, and Marcus J. Tindall. 2017. "Methods of Model Reduction for Large-Scale Biological Systems: A Survey of Current Methods and Trends." *Bulletin of Mathematical Biology* 79 (7): 1449–86. <https://doi.org/10.1007/s11538-017-0277-2>.
- Sorokina, Oksana, Anatoly Sorokin, and J. Douglas Armstrong. 2011. "Towards a Quantitative Model of the Post-Synaptic Proteome." *Molecular BioSystems* 7 (10): 2813–23. <https://doi.org/10.1039/c1mb05152k>.
- Stiles, Joel R, and Thomas M Bartol. 2001. "Monte Carlo Methods for Simulating Realistic Synaptic Microphysiology Using MCell." In *Computational Neuroscience: Realistic Modeling for Experimentalists*, Editor Erik De Schutter, 87–127. CRC Press.
- Südhof, Thomas C. 2017. "Synaptic Neurexin Complexes: A Molecular Code for the Logic of Neural Circuits." *Cell* 171 (4): 745–69. <https://doi.org/10.1016/j.cell.2017.10.024>.
- Taylor, Stephanie R., Francis J. Doyle, and Linda R. Petzold. 2008. "Oscillator Model Reduction Preserving the Phase Response: Application to the Circadian Clock." *Biophysical Journal* 95 (4): 1658–73. <https://doi.org/10.1529/biophysj.107.128678>.
- Viswan, Nisha A., Gubbi Vani HarshaRani, Melanie I. Stefan, and Upinder S. Bhalla. 2018. "FindSim: A Framework for Integrating Neuronal Data and Signaling Models." *Frontiers in Neuroinformatics* 12. <https://doi.org/10.3389/fninf.2018.00038>.
- Wallace, E W J, D T Gillespie, K R Sanft, and L R Petzold. 2012. "Linear Noise Approximation Is Valid over Limited Times for Any Chemical System That Is Sufficiently Large." *IET Systems Biology* 6 (4): 102–15. <https://doi.org/10.1049/iet-syb.2011.0038>.
- Welsh, Ciaran M., Nicola Fullard, Carole J. Proctor, Alvaro Martinez-Guimera, Robert J. Isfort, Charles C. Bascom, Ryan Tasseff, Stefan A. Przyborski, and Daryl P. Shanley. 2018. "PyCoTools: A Python Toolbox for COPASI." *Bioinformatics (Oxford, England)* 34 (21): 3702–10. <https://doi.org/10.1093/bioinformatics/bty409>.
- Wils, Stefan, and Erik De Schutter. 2009. "STEPS: Modeling and Simulating Complex Reaction-Diffusion Systems with Python." *Frontiers in Neuroinformatics* 3: 15. <https://doi.org/10.3389/neuro.11.015.2009>.
- Wilson, Daniel E., David E. Whitney, Benjamin Scholl, and David Fitzpatrick. 2016. "Orientation Selectivity and the Functional Clustering of Synaptic Inputs in Primary Visual Cortex." *Nature Neuroscience* 19 (8): 1003–9. <https://doi.org/10.1038/nn.4323>.
- Zhu, Ciyu, Richard H. Byrd, Peihuang Lu, and Jorge Nocedal. 1997. "Algorithm 778: L-BFGS-B: Fortran Subroutines for Large-Scale Bound-Constrained Optimization." *ACM Transactions on Mathematical Software* 23 (4): 550–60. <https://doi.org/10.1145/279232.279236>.

## 956 **List of Legends for supporting information files.**

957

958 **Supplementary Figure S1.** HillTau fits to simple mass-action reactions indicated on top of each  
959 figure panel. Each of these is a single HillTau ‘reaction’ where ‘input’ is activator in all but Panel E,  
960 where ‘input’ is an inhibitor. In all cases the rising phase fits exactly, but in panels A, C and E the  
961 falling phase has a different time-course.

962

963 **Supplementary Figure S5.1.** Fit of single-reaction HillTau Model to protein synthesis pathway.  
964 Model is as in Figure 5B. Panels A-F correspond to panels D-I in Figure 5. In all cases protein  
965 production rate is readout. Blue plots are reference, orange are HillTau. A: BDNF@3.7 nM +  
966  $\text{Ca}^{2+}$ @0.2  $\mu\text{M}$ , 900 seconds. B: BDNF@3.7nM,  $\text{Ca}^{2+}$ @1 $\mu\text{M}$ . C: 3 pulses of BDNF@3.7 nM for 5s,  
967 coincident with  $\text{Ca}^{2+}$ @10 $\mu\text{M}$  for 1s, pulses separated by 300 s. D: Same as C, but  $\text{Ca}^{2+}$  held at  
968 baseline of 0.08  $\mu\text{M}$ . E: Dose-response of protein vs.  $\text{Ca}^{2+}$ , holding BDNF fixed at 3.7 nM. F: Dose-  
969 response of protein vs BDNF, holding  $\text{Ca}^{2+}$  fixed at 0.08  $\mu\text{M}$ . G: MASH optimization waveform  
970 used to fit the HillTau model for protein synthesis.

971

972 **Supplementary Figure S5.2.** Fitting S6K to the protein synthesis pathway model. HillTau  
973 reactions as in Figure 5C. Panels A-F correspond to panels D-I in Figure 5. In all cases activated  
974 S6K concentration is readout. Blue plots are reference, orange are HillTau. A: BDNF@3.7 nM +  
975  $\text{Ca}^{2+}$ @0.2  $\mu\text{M}$ , 900 seconds. B: BDNF@3.7nM,  $\text{Ca}^{2+}$ @1 $\mu\text{M}$ . C: 3 pulses of BDNF@3.7 nM for 5s,  
976 coincident with  $\text{Ca}^{2+}$ @10 $\mu\text{M}$  for 1s, pulses separated by 300 s. D: Same as C, but  $\text{Ca}^{2+}$  held at  
977 baseline of 0.08  $\mu\text{M}$ . E: Dose-response of protein vs.  $\text{Ca}^{2+}$ , holding BDNF fixed at 3.7 nM. F: Dose-  
978 response of protein vs BDNF, holding  $\text{Ca}^{2+}$  fixed at 0.08  $\mu\text{M}$ . G: MASH optimization waveform  
979 used to fit the HillTau model for S6K activation.

980



981 **Supplementary Figure S5.3.** Fitting CaMKIII to the protein synthesis pathway model. HillTau  
 982 reactions as in Figure 5C. Panels A-F correspond to panels D-I in Figure 5. In all cases activated  
 983 CaMKIII concentration is readout. Blue plots are reference, orange are HillTau. A: BDNF@3.7 nM  
 984 + Ca<sup>2+</sup>@0.2 μM, 900 seconds. B: BDNF@3.7nM, Ca<sup>2+</sup>@1μM. C: 3 pulses of BDNF@3.7 nM for  
 985 5s, coincident with Ca<sup>2+</sup>@10μM for 1s, pulses separated by 300 s. D: Same as C, but Ca<sup>2+</sup> held at  
 986 baseline of 0.08 μM. E: Dose-response of protein vs. Ca<sup>2+</sup>, holding BDNF fixed at 3.7 nM. F: Dose-  
 987 response of protein vs BDNF, holding Ca<sup>2+</sup> fixed at 0.08 μM. G: MASH optimization waveform  
 988 used to fit the HillTau model for CaMKIII activation.

989

990 **Supplementary Figure S5.4.** Conversion of HillTau models to SBML, and comparison of the  
 991 resultant responses simulated in HillTau and COPASI respectively. A: Oscillator model. This uses  
 992 only 'tau' in its formulation, and fits to within 1%. B. Feedback inhibition model from Fig 2. A 1  
 993 uM stimulus is delivered at t = 20, and it lasts till t = 60. This has a mediocre fit or 29%. C-E:  
 994 Protein synthesis model. C. Comparing protein synthesis response to a BDNF stimulus of 5 nM  
 995 from t = 2000s to t = 3000s. Fit = 30% is mediocre. D. S6K activation in response to a BDNF  
 996 stimulus of 5 nM from t = 2000s to t = 3000s. Fit = 26% is mediocre. E. CaMKIII activation in  
 997 response to a calcium stimulus of 5 uM from t = 2000 to t = 3000s. This fits well, 1.7%. F. HillTau  
 998 reaction scheme for oscillator model.

999

1000 **Supplementary Figure S6.1** HillTau model schematic for largest model in figure 6, with 35  
 1001 HillTau parameters and 11 reactions.

1002

1003 **Supplementary Figure S7.** Dependence of HillTau simulation output on timestep. In all panels the  
 1004 dashed lines represent the time-series, and the dots represent the sample points for estimating error  
 1005 using the smallest timestep as reference. Accuracy is reported as normalized root-mean square

1006 difference from smallest timestep. A: Feedback inhibition. Step stimulus of 1 uM is given at  $t = 10s$ ,  
 1007 which lasts till  $t = 50s$ . 1% accuracy is achieved for  $dt=1s$ . B: feedforward inhibition. Stimulus same  
 1008 as A. 1.5% accuracy at  $dt=1s$ . C: BCM curve. Stimulus of 1 uM is given at  $t = 10s$  and stays till the  
 1009 end of the simulation. 1% accuracy at  $dt=1s$ . D: Kholodenko oscillator. Here the system is free-  
 1010 running. 1.2% accuracy at  $dt=6s$ .

1011

## 1012 **Supplementary code directory**

1013

1014 The zipfile with supplementary code expands out into a directory which has Python scripts and  
 1015 model definition files for generating all the simulated components of the figures in the paper,  
 1016 including supplementary figures. Detailed instructions for running the scripts are provided in the  
 1017 README.txt file in the same directory. The scripts should run with Python 3.x, but many figures  
 1018 require additional software installation for the ODE simulators MOOSE and COPASI, as well as  
 1019 some other packages. Details are provided in the README.txt.

1020

1021
